# Supplementary material for: From Arksey and O’Malley and Beyond: Customizations to enhance a team-based, mixed approach to scoping review methodology
Source: PubMed Central journal article supplement (PMC8374523; doi:10.1016/j.mex.2021.101375), 2021-05-07
Supplement: mmc2.pdf [file mmc2.pdf]

**Outcomes affiliated with Child Advocacy Centers: A Scoping Review**

PID

3280

Codebook ▾

**Data Dictionary Codebook**

06/30/2020 12:48pm

^ Collapse all instruments

^ Collapse all instruments

| #                                                                                                                      | Variable / Field Name | Field Label<br><i>Field Note</i> | Field Attributes (Field Type, Validation, Choices, Calculations, etc.)                                                                                                                                                                                                                                                                                                                                                                                                                                            |   |         |   |           |   |                   |    |       |   |          |   |       |   |         |   |         |   |           |   |     |    |      |    |    |
|------------------------------------------------------------------------------------------------------------------------|-----------------------|----------------------------------|-------------------------------------------------------------------------------------------------------------------------------------------------------------------------------------------------------------------------------------------------------------------------------------------------------------------------------------------------------------------------------------------------------------------------------------------------------------------------------------------------------------------|---|---------|---|-----------|---|-------------------|----|-------|---|----------|---|-------|---|---------|---|---------|---|-----------|---|-----|----|------|----|----|
| Instrument: <b>Scoping Review: CACS</b> (scoping_review_cacs) <span style="float: right;">^ Collapse ^ Collapse</span> |                       |                                  |                                                                                                                                                                                                                                                                                                                                                                                                                                                                                                                   |   |         |   |           |   |                   |    |       |   |          |   |       |   |         |   |         |   |           |   |     |    |      |    |    |
| 1                                                                                                                      | record_id             | Record ID                        | text                                                                                                                                                                                                                                                                                                                                                                                                                                                                                                              |   |         |   |           |   |                   |    |       |   |          |   |       |   |         |   |         |   |           |   |     |    |      |    |    |
| 2                                                                                                                      | author                | Author(s):                       | text                                                                                                                                                                                                                                                                                                                                                                                                                                                                                                              |   |         |   |           |   |                   |    |       |   |          |   |       |   |         |   |         |   |           |   |     |    |      |    |    |
| 3                                                                                                                      | title                 | Title of article:                | text                                                                                                                                                                                                                                                                                                                                                                                                                                                                                                              |   |         |   |           |   |                   |    |       |   |          |   |       |   |         |   |         |   |           |   |     |    |      |    |    |
| 4                                                                                                                      | year                  | Year of publication:             | text                                                                                                                                                                                                                                                                                                                                                                                                                                                                                                              |   |         |   |           |   |                   |    |       |   |          |   |       |   |         |   |         |   |           |   |     |    |      |    |    |
| 5                                                                                                                      | journal               | Name of Journal:                 | text                                                                                                                                                                                                                                                                                                                                                                                                                                                                                                              |   |         |   |           |   |                   |    |       |   |          |   |       |   |         |   |         |   |           |   |     |    |      |    |    |
| 6                                                                                                                      | doi                   | DOI:                             | text                                                                                                                                                                                                                                                                                                                                                                                                                                                                                                              |   |         |   |           |   |                   |    |       |   |          |   |       |   |         |   |         |   |           |   |     |    |      |    |    |
| 7                                                                                                                      | link                  | Link to the article:             | text                                                                                                                                                                                                                                                                                                                                                                                                                                                                                                              |   |         |   |           |   |                   |    |       |   |          |   |       |   |         |   |         |   |           |   |     |    |      |    |    |
| 8                                                                                                                      | article_pdf           | Article:                         | file                                                                                                                                                                                                                                                                                                                                                                                                                                                                                                              |   |         |   |           |   |                   |    |       |   |          |   |       |   |         |   |         |   |           |   |     |    |      |    |    |
| 9                                                                                                                      | abstract              | Abstract:                        | notes<br>Custom alignment: LV                                                                                                                                                                                                                                                                                                                                                                                                                                                                                     |   |         |   |           |   |                   |    |       |   |          |   |       |   |         |   |         |   |           |   |     |    |      |    |    |
| 10                                                                                                                     | keyword               | Keywords:                        | text                                                                                                                                                                                                                                                                                                                                                                                                                                                                                                              |   |         |   |           |   |                   |    |       |   |          |   |       |   |         |   |         |   |           |   |     |    |      |    |    |
| 11                                                                                                                     | auth_discipline       | Discipline of first author:      | text                                                                                                                                                                                                                                                                                                                                                                                                                                                                                                              |   |         |   |           |   |                   |    |       |   |          |   |       |   |         |   |         |   |           |   |     |    |      |    |    |
| 12                                                                                                                     | pdf                   | PDF                              | file                                                                                                                                                                                                                                                                                                                                                                                                                                                                                                              |   |         |   |           |   |                   |    |       |   |          |   |       |   |         |   |         |   |           |   |     |    |      |    |    |
| 13                                                                                                                     | reviewer              | Reviewer:                        | dropdown <table border="1" style="margin-left: 20px;"> <tr><td>1</td><td>Zawacki</td></tr> <tr><td>2</td><td>Westphaln</td></tr> <tr><td>3</td><td>Vazquez-Westphaln</td></tr> <tr><td>12</td><td>Ronis</td></tr> <tr><td>4</td><td>Regoeczi</td></tr> <tr><td>5</td><td>Panda</td></tr> <tr><td>6</td><td>McDavid</td></tr> <tr><td>7</td><td>Masotya</td></tr> <tr><td>8</td><td>Lounsbury</td></tr> <tr><td>9</td><td>Lee</td></tr> <tr><td>10</td><td>Garg</td></tr> <tr><td>11</td><td>QA</td></tr> </table> | 1 | Zawacki | 2 | Westphaln | 3 | Vazquez-Westphaln | 12 | Ronis | 4 | Regoeczi | 5 | Panda | 6 | McDavid | 7 | Masotya | 8 | Lounsbury | 9 | Lee | 10 | Garg | 11 | QA |
| 1                                                                                                                      | Zawacki               |                                  |                                                                                                                                                                                                                                                                                                                                                                                                                                                                                                                   |   |         |   |           |   |                   |    |       |   |          |   |       |   |         |   |         |   |           |   |     |    |      |    |    |
| 2                                                                                                                      | Westphaln             |                                  |                                                                                                                                                                                                                                                                                                                                                                                                                                                                                                                   |   |         |   |           |   |                   |    |       |   |          |   |       |   |         |   |         |   |           |   |     |    |      |    |    |
| 3                                                                                                                      | Vazquez-Westphaln     |                                  |                                                                                                                                                                                                                                                                                                                                                                                                                                                                                                                   |   |         |   |           |   |                   |    |       |   |          |   |       |   |         |   |         |   |           |   |     |    |      |    |    |
| 12                                                                                                                     | Ronis                 |                                  |                                                                                                                                                                                                                                                                                                                                                                                                                                                                                                                   |   |         |   |           |   |                   |    |       |   |          |   |       |   |         |   |         |   |           |   |     |    |      |    |    |
| 4                                                                                                                      | Regoeczi              |                                  |                                                                                                                                                                                                                                                                                                                                                                                                                                                                                                                   |   |         |   |           |   |                   |    |       |   |          |   |       |   |         |   |         |   |           |   |     |    |      |    |    |
| 5                                                                                                                      | Panda                 |                                  |                                                                                                                                                                                                                                                                                                                                                                                                                                                                                                                   |   |         |   |           |   |                   |    |       |   |          |   |       |   |         |   |         |   |           |   |     |    |      |    |    |
| 6                                                                                                                      | McDavid               |                                  |                                                                                                                                                                                                                                                                                                                                                                                                                                                                                                                   |   |         |   |           |   |                   |    |       |   |          |   |       |   |         |   |         |   |           |   |     |    |      |    |    |
| 7                                                                                                                      | Masotya               |                                  |                                                                                                                                                                                                                                                                                                                                                                                                                                                                                                                   |   |         |   |           |   |                   |    |       |   |          |   |       |   |         |   |         |   |           |   |     |    |      |    |    |
| 8                                                                                                                      | Lounsbury             |                                  |                                                                                                                                                                                                                                                                                                                                                                                                                                                                                                                   |   |         |   |           |   |                   |    |       |   |          |   |       |   |         |   |         |   |           |   |     |    |      |    |    |
| 9                                                                                                                      | Lee                   |                                  |                                                                                                                                                                                                                                                                                                                                                                                                                                                                                                                   |   |         |   |           |   |                   |    |       |   |          |   |       |   |         |   |         |   |           |   |     |    |      |    |    |
| 10                                                                                                                     | Garg                  |                                  |                                                                                                                                                                                                                                                                                                                                                                                                                                                                                                                   |   |         |   |           |   |                   |    |       |   |          |   |       |   |         |   |         |   |           |   |     |    |      |    |    |
| 11                                                                                                                     | QA                    |                                  |                                                                                                                                                                                                                                                                                                                                                                                                                                                                                                                   |   |         |   |           |   |                   |    |       |   |          |   |       |   |         |   |         |   |           |   |     |    |      |    |    |
| 14                                                                                                                     | exclude               | Exclude after full text review:  | radio <table border="1" style="margin-left: 20px;"> <tr><td>1</td><td>Yes</td></tr> <tr><td>0</td><td>No</td></tr> <tr><td>3</td><td>Don't know</td></tr> </table>                                                                                                                                                                                                                                                                                                                                                | 1 | Yes     | 0 | No        | 3 | Don't know        |    |       |   |          |   |       |   |         |   |         |   |           |   |     |    |      |    |    |
| 1                                                                                                                      | Yes                   |                                  |                                                                                                                                                                                                                                                                                                                                                                                                                                                                                                                   |   |         |   |           |   |                   |    |       |   |          |   |       |   |         |   |         |   |           |   |     |    |      |    |    |
| 0                                                                                                                      | No                    |                                  |                                                                                                                                                                                                                                                                                                                                                                                                                                                                                                                   |   |         |   |           |   |                   |    |       |   |          |   |       |   |         |   |         |   |           |   |     |    |      |    |    |
| 3                                                                                                                      | Don't know            |                                  |                                                                                                                                                                                                                                                                                                                                                                                                                                                                                                                   |   |         |   |           |   |                   |    |       |   |          |   |       |   |         |   |         |   |           |   |     |    |      |    |    |
| 15                                                                                                                     | exclusion_reason      | Reason for exclusion:            | checkbox                                                                                                                                                                                                                                                                                                                                                                                                                                                                                                          |   |         |   |           |   |                   |    |       |   |          |   |       |   |         |   |         |   |           |   |     |    |      |    |    |

Show the field ONLY if:  
[exclude] = '1'

|   |                     |                                    |
|---|---------------------|------------------------------------|
| 1 | exclusion_reason__1 | Not in USA                         |
| 2 | exclusion_reason__2 | Not in English                     |
| 3 | exclusion_reason__3 | Abused individual is 18+ years old |
| 4 | exclusion_reason__4 | Full text not available            |
| 5 | exclusion_reason__5 | Not R/T CAC                        |
| 6 | exclusion_reason__6 | Other                              |

16 reason\_other  
Show the field ONLY if:  
[exclusion\_reason(6)] = '1'

Other:

text

17 comments

Reviewer comments:

notes

18 state  
Show the field ONLY if:  
[exclude] = '0'

Section Header: *SETTING OF PAPER*  
US State (if noted):

dropdown

|    |                     |
|----|---------------------|
| 1  | Alabama - AL        |
| 2  | Alaska - AK         |
| 3  | Arizona - AZ        |
| 4  | Arkansas - AR       |
| 5  | California - CA     |
| 6  | Colorado - CO       |
| 7  | Connecticut - CT    |
| 8  | Delaware - DE       |
| 9  | Florida - FL        |
| 10 | Georgia - GA        |
| 11 | Hawaii - HI         |
| 12 | Idaho - ID          |
| 13 | Illinois - IL       |
| 14 | Indiana - IN        |
| 15 | Iowa - IA           |
| 16 | Kansas - KS         |
| 17 | Kentucky - KY       |
| 18 | Louisiana - LA      |
| 19 | Maine - ME          |
| 20 | Maryland - MD       |
| 21 | Massachusetts - MA  |
| 22 | Michigan - MI       |
| 23 | Minnesota - MN      |
| 24 | Mississippi - MS    |
| 25 | Missouri - MO       |
| 26 | Montana - MT        |
| 27 | Nebraska - NE       |
| 28 | Nevada - NV         |
| 29 | New Hampshire - NH  |
| 30 | New Jersey - NJ     |
| 31 | New Mexico - NM     |
| 32 | New York - NY       |
| 33 | North Carolina - NC |
| 34 | North Dakota - ND   |
| 35 | Ohio - OH           |

|    |                     |
|----|---------------------|
| 36 | Oklahoma - OK       |
| 37 | Oregon - OR         |
| 38 | Pennsylvania - PA   |
| 39 | Rhode Island - RI   |
| 40 | South Carolina - SC |
| 41 | South Dakota - SD   |
| 42 | Tennessee - TN      |
| 43 | Texas - TX          |
| 44 | Utah - UT           |
| 45 | Vermont - VT        |
| 46 | Virginia - VA       |
| 47 | Washington - WA     |
| 48 | West Virginia - WV  |
| 49 | Wisconsin - WI      |
| 50 | Wyoming - WY        |
| 51 | Multiple States     |

|   |               |                                                                                     |                                                       |                                                                                                                                                                                                                           |   |       |   |       |   |          |   |               |   |       |
|---|---------------|-------------------------------------------------------------------------------------|-------------------------------------------------------|---------------------------------------------------------------------------------------------------------------------------------------------------------------------------------------------------------------------------|---|-------|---|-------|---|----------|---|---------------|---|-------|
|   | 19            | multiple_states<br>Show the field ONLY if:<br>[state] = '51'                        | Multiple States:                                      | text                                                                                                                                                                                                                      |   |       |   |       |   |          |   |               |   |       |
|   | 20            | community<br>Show the field ONLY if:<br>[exclude] = '0'                             | Residential Community:                                | radio<br><table border="1"> <tr><td>1</td><td>rural</td></tr> <tr><td>2</td><td>urban</td></tr> <tr><td>3</td><td>suburban</td></tr> <tr><td>4</td><td>not specified</td></tr> <tr><td>5</td><td>other</td></tr> </table> | 1 | rural | 2 | urban | 3 | suburban | 4 | not specified | 5 | other |
| 1 | rural         |                                                                                     |                                                       |                                                                                                                                                                                                                           |   |       |   |       |   |          |   |               |   |       |
| 2 | urban         |                                                                                     |                                                       |                                                                                                                                                                                                                           |   |       |   |       |   |          |   |               |   |       |
| 3 | suburban      |                                                                                     |                                                       |                                                                                                                                                                                                                           |   |       |   |       |   |          |   |               |   |       |
| 4 | not specified |                                                                                     |                                                       |                                                                                                                                                                                                                           |   |       |   |       |   |          |   |               |   |       |
| 5 | other         |                                                                                     |                                                       |                                                                                                                                                                                                                           |   |       |   |       |   |          |   |               |   |       |
|   | 21            | community_other<br>Show the field ONLY if:<br>[community] = '5' and [exclude] = '0' | Other:                                                | text                                                                                                                                                                                                                      |   |       |   |       |   |          |   |               |   |       |
|   | 22            | purpose<br>Show the field ONLY if:<br>[exclude] = '0'                               | Section Header: <i>INTRODUCTION</i><br>Study purpose: | notes                                                                                                                                                                                                                     |   |       |   |       |   |          |   |               |   |       |
|   | 23            | aims<br>Show the field ONLY if:<br>[exclude] = '0'                                  | Aim 1:<br><i>if applicable</i>                        | notes                                                                                                                                                                                                                     |   |       |   |       |   |          |   |               |   |       |
|   | 24            | aims_2<br>Show the field ONLY if:<br>[exclude] = '0' and [aims] <> "                | Aim 2:<br><i>if applicable</i>                        | notes                                                                                                                                                                                                                     |   |       |   |       |   |          |   |               |   |       |
|   | 25            | aims_3<br>Show the field ONLY if:<br>[exclude] = '0' and [aims_2] <> "              | Aim 3:<br><i>if applicable</i>                        | notes                                                                                                                                                                                                                     |   |       |   |       |   |          |   |               |   |       |
|   | 26            | aim_4<br>Show the field ONLY if:<br>[exclude] = '0' and [aims_3] <> "               | Aim 4:                                                | notes                                                                                                                                                                                                                     |   |       |   |       |   |          |   |               |   |       |
|   | 27            | aim_5<br>Show the field ONLY if:<br>[exclude] = '0' and [aim_4] <> ' ' ,            | Aim 5:                                                | notes                                                                                                                                                                                                                     |   |       |   |       |   |          |   |               |   |       |

|    |                                                                                                           |                                                                                                                                                                           |                                                                                                                                                                                                                                                                                                                                                                                                                                                                                                    |   |                       |   |                    |   |                                             |   |                             |   |                                              |   |                             |   |                                         |
|----|-----------------------------------------------------------------------------------------------------------|---------------------------------------------------------------------------------------------------------------------------------------------------------------------------|----------------------------------------------------------------------------------------------------------------------------------------------------------------------------------------------------------------------------------------------------------------------------------------------------------------------------------------------------------------------------------------------------------------------------------------------------------------------------------------------------|---|-----------------------|---|--------------------|---|---------------------------------------------|---|-----------------------------|---|----------------------------------------------|---|-----------------------------|---|-----------------------------------------|
| 28 | other_framework<br>Show the field ONLY if:<br>[exclude] = '0'                                             | Does the study refer to a theory, framework, or model other than the CAC model?                                                                                           | yesno<br><table border="1"> <tr> <td>1</td> <td>Yes</td> </tr> <tr> <td>0</td> <td>No</td> </tr> </table>                                                                                                                                                                                                                                                                                                                                                                                          | 1 | Yes                   | 0 | No                 |   |                                             |   |                             |   |                                              |   |                             |   |                                         |
| 1  | Yes                                                                                                       |                                                                                                                                                                           |                                                                                                                                                                                                                                                                                                                                                                                                                                                                                                    |   |                       |   |                    |   |                                             |   |                             |   |                                              |   |                             |   |                                         |
| 0  | No                                                                                                        |                                                                                                                                                                           |                                                                                                                                                                                                                                                                                                                                                                                                                                                                                                    |   |                       |   |                    |   |                                             |   |                             |   |                                              |   |                             |   |                                         |
| 29 | framework2<br>Show the field ONLY if:<br>[exclude] = '0' and [other_framework]='1'                        | Which theory, framework or model:<br><i>one theory, framework, or model per box</i>                                                                                       | text                                                                                                                                                                                                                                                                                                                                                                                                                                                                                               |   |                       |   |                    |   |                                             |   |                             |   |                                              |   |                             |   |                                         |
| 30 | framework3<br>Show the field ONLY if:<br>[exclude] = '0' and [other_framework]='1' and [framework2] <> "  | Additional theory, framework or model:<br><i>one theory, framework, or model per box</i>                                                                                  | text                                                                                                                                                                                                                                                                                                                                                                                                                                                                                               |   |                       |   |                    |   |                                             |   |                             |   |                                              |   |                             |   |                                         |
| 31 | framework4<br>Show the field ONLY if:<br>[exclude] = '0' and [other_framework]='1' and [framework3] <> "  | Additional theory, framework or model:<br><i>one theory, framework, or model per box</i>                                                                                  | text                                                                                                                                                                                                                                                                                                                                                                                                                                                                                               |   |                       |   |                    |   |                                             |   |                             |   |                                              |   |                             |   |                                         |
| 32 | framework5<br>Show the field ONLY if:<br>[exclude] = '0' and [other_framework]='1' and [framework4] <> "  | Additional theory, framework or model:<br><i>one theory, framework, or model per box</i>                                                                                  | text                                                                                                                                                                                                                                                                                                                                                                                                                                                                                               |   |                       |   |                    |   |                                             |   |                             |   |                                              |   |                             |   |                                         |
| 33 | framework6<br>Show the field ONLY if:<br>[exclude] = '0' and [other_framework]='1' and [framework5] <> "  | Additional theory, framework or model:<br><i>one theory, framework, or model per box</i>                                                                                  | text                                                                                                                                                                                                                                                                                                                                                                                                                                                                                               |   |                       |   |                    |   |                                             |   |                             |   |                                              |   |                             |   |                                         |
| 34 | framework7<br>Show the field ONLY if:<br>[exclude] = '0' and [other_framework]='1' and [framework6] <> "  | Additional theory, framework or model:<br><i>one theory, framework, or model per box</i>                                                                                  | text                                                                                                                                                                                                                                                                                                                                                                                                                                                                                               |   |                       |   |                    |   |                                             |   |                             |   |                                              |   |                             |   |                                         |
| 35 | framework8<br>Show the field ONLY if:<br>[exclude] = '0' and [other_framework]='1' and [framework7] <> "  | Additional theory, framework or model:<br><i>one theory, framework, or model per box</i>                                                                                  | text                                                                                                                                                                                                                                                                                                                                                                                                                                                                                               |   |                       |   |                    |   |                                             |   |                             |   |                                              |   |                             |   |                                         |
| 36 | framework9<br>Show the field ONLY if:<br>[exclude] = '0' and [other_framework]='1' and [framework8] <> "  | Additional theory, framework or model:<br><i>one theory, framework, or model per box</i>                                                                                  | text                                                                                                                                                                                                                                                                                                                                                                                                                                                                                               |   |                       |   |                    |   |                                             |   |                             |   |                                              |   |                             |   |                                         |
| 37 | framework10<br>Show the field ONLY if:<br>[exclude] = '0' and [other_framework]='1' and [framework9] <> " | Additional theory, framework or model:<br><i>one theory, framework, or model per box</i>                                                                                  | text                                                                                                                                                                                                                                                                                                                                                                                                                                                                                               |   |                       |   |                    |   |                                             |   |                             |   |                                              |   |                             |   |                                         |
| 38 | branch<br>Show the field ONLY if:<br>[exclude] = '0'                                                      | Section Header: <i>POPULATION</i><br>From the statement of purpose and aims of this paper, which branch of the CAC multidisciplinary team does this paper mainly involve? | dropdown<br><table border="1"> <tr> <td>1</td> <td>Medical team/services</td> </tr> <tr> <td>2</td> <td>Mental health team</td> </tr> <tr> <td>3</td> <td>Child protection services/ social work team</td> </tr> <tr> <td>4</td> <td>Law enforcement/police team</td> </tr> <tr> <td>5</td> <td>Prosecution/lawyers team (district attorney)</td> </tr> <tr> <td>6</td> <td>Victim/family advocacy team</td> </tr> <tr> <td>7</td> <td>Specific to forensic interview services</td> </tr> </table> | 1 | Medical team/services | 2 | Mental health team | 3 | Child protection services/ social work team | 4 | Law enforcement/police team | 5 | Prosecution/lawyers team (district attorney) | 6 | Victim/family advocacy team | 7 | Specific to forensic interview services |
| 1  | Medical team/services                                                                                     |                                                                                                                                                                           |                                                                                                                                                                                                                                                                                                                                                                                                                                                                                                    |   |                       |   |                    |   |                                             |   |                             |   |                                              |   |                             |   |                                         |
| 2  | Mental health team                                                                                        |                                                                                                                                                                           |                                                                                                                                                                                                                                                                                                                                                                                                                                                                                                    |   |                       |   |                    |   |                                             |   |                             |   |                                              |   |                             |   |                                         |
| 3  | Child protection services/ social work team                                                               |                                                                                                                                                                           |                                                                                                                                                                                                                                                                                                                                                                                                                                                                                                    |   |                       |   |                    |   |                                             |   |                             |   |                                              |   |                             |   |                                         |
| 4  | Law enforcement/police team                                                                               |                                                                                                                                                                           |                                                                                                                                                                                                                                                                                                                                                                                                                                                                                                    |   |                       |   |                    |   |                                             |   |                             |   |                                              |   |                             |   |                                         |
| 5  | Prosecution/lawyers team (district attorney)                                                              |                                                                                                                                                                           |                                                                                                                                                                                                                                                                                                                                                                                                                                                                                                    |   |                       |   |                    |   |                                             |   |                             |   |                                              |   |                             |   |                                         |
| 6  | Victim/family advocacy team                                                                               |                                                                                                                                                                           |                                                                                                                                                                                                                                                                                                                                                                                                                                                                                                    |   |                       |   |                    |   |                                             |   |                             |   |                                              |   |                             |   |                                         |
| 7  | Specific to forensic interview services                                                                   |                                                                                                                                                                           |                                                                                                                                                                                                                                                                                                                                                                                                                                                                                                    |   |                       |   |                    |   |                                             |   |                             |   |                                              |   |                             |   |                                         |

|    |                                                                              |                                                                                                   |  |                                                                                                                                                                                                                                                                                                                                                                                                                                                                                                                                                                                                                                                                                                                                                                                                |   |               |                  |             |               |                |   |                                           |                  |                                           |               |                                     |   |                   |           |              |          |                |    |                    |       |                    |    |                  |    |                       |    |                |    |       |
|----|------------------------------------------------------------------------------|---------------------------------------------------------------------------------------------------|--|------------------------------------------------------------------------------------------------------------------------------------------------------------------------------------------------------------------------------------------------------------------------------------------------------------------------------------------------------------------------------------------------------------------------------------------------------------------------------------------------------------------------------------------------------------------------------------------------------------------------------------------------------------------------------------------------------------------------------------------------------------------------------------------------|---|---------------|------------------|-------------|---------------|----------------|---|-------------------------------------------|------------------|-------------------------------------------|---------------|-------------------------------------|---|-------------------|-----------|--------------|----------|----------------|----|--------------------|-------|--------------------|----|------------------|----|-----------------------|----|----------------|----|-------|
|    |                                                                              |                                                                                                   |  | 8 CAC human resources (such as manager or directors)                                                                                                                                                                                                                                                                                                                                                                                                                                                                                                                                                                                                                                                                                                                                           |   |               |                  |             |               |                |   |                                           |                  |                                           |               |                                     |   |                   |           |              |          |                |    |                    |       |                    |    |                  |    |                       |    |                |    |       |
|    |                                                                              |                                                                                                   |  | 9 combination                                                                                                                                                                                                                                                                                                                                                                                                                                                                                                                                                                                                                                                                                                                                                                                  |   |               |                  |             |               |                |   |                                           |                  |                                           |               |                                     |   |                   |           |              |          |                |    |                    |       |                    |    |                  |    |                       |    |                |    |       |
| 39 | pop_combination<br>Show the field ONLY if:<br>[exclude] = '0'                | Combination:                                                                                      |  | text                                                                                                                                                                                                                                                                                                                                                                                                                                                                                                                                                                                                                                                                                                                                                                                           |   |               |                  |             |               |                |   |                                           |                  |                                           |               |                                     |   |                   |           |              |          |                |    |                    |       |                    |    |                  |    |                       |    |                |    |       |
| 40 | abuse_type<br>Show the field ONLY if:<br>[exclude] = '0'                     | What type of abuse is mentioned in this paper (choose all that apply)                             |  | checkbox<br><table border="1"> <tr><td>1</td><td>abuse_type__1</td><td>Physical</td></tr> <tr><td>2</td><td>abuse_type__2</td><td>Sexual</td></tr> <tr><td>3</td><td>abuse_type__3</td><td>Emotional</td></tr> <tr><td>4</td><td>abuse_type__4</td><td>Neglect</td></tr> <tr><td>5</td><td>abuse_type__5</td><td>Other</td></tr> </table>                                                                                                                                                                                                                                                                                                                                                                                                                                                      | 1 | abuse_type__1 | Physical         | 2           | abuse_type__2 | Sexual         | 3 | abuse_type__3                             | Emotional        | 4                                         | abuse_type__4 | Neglect                             | 5 | abuse_type__5     | Other     |              |          |                |    |                    |       |                    |    |                  |    |                       |    |                |    |       |
| 1  | abuse_type__1                                                                | Physical                                                                                          |  |                                                                                                                                                                                                                                                                                                                                                                                                                                                                                                                                                                                                                                                                                                                                                                                                |   |               |                  |             |               |                |   |                                           |                  |                                           |               |                                     |   |                   |           |              |          |                |    |                    |       |                    |    |                  |    |                       |    |                |    |       |
| 2  | abuse_type__2                                                                | Sexual                                                                                            |  |                                                                                                                                                                                                                                                                                                                                                                                                                                                                                                                                                                                                                                                                                                                                                                                                |   |               |                  |             |               |                |   |                                           |                  |                                           |               |                                     |   |                   |           |              |          |                |    |                    |       |                    |    |                  |    |                       |    |                |    |       |
| 3  | abuse_type__3                                                                | Emotional                                                                                         |  |                                                                                                                                                                                                                                                                                                                                                                                                                                                                                                                                                                                                                                                                                                                                                                                                |   |               |                  |             |               |                |   |                                           |                  |                                           |               |                                     |   |                   |           |              |          |                |    |                    |       |                    |    |                  |    |                       |    |                |    |       |
| 4  | abuse_type__4                                                                | Neglect                                                                                           |  |                                                                                                                                                                                                                                                                                                                                                                                                                                                                                                                                                                                                                                                                                                                                                                                                |   |               |                  |             |               |                |   |                                           |                  |                                           |               |                                     |   |                   |           |              |          |                |    |                    |       |                    |    |                  |    |                       |    |                |    |       |
| 5  | abuse_type__5                                                                | Other                                                                                             |  |                                                                                                                                                                                                                                                                                                                                                                                                                                                                                                                                                                                                                                                                                                                                                                                                |   |               |                  |             |               |                |   |                                           |                  |                                           |               |                                     |   |                   |           |              |          |                |    |                    |       |                    |    |                  |    |                       |    |                |    |       |
| 41 | other_abuse<br>Show the field ONLY if:<br>[abuse_type(5)] = '1'              | other:                                                                                            |  | text                                                                                                                                                                                                                                                                                                                                                                                                                                                                                                                                                                                                                                                                                                                                                                                           |   |               |                  |             |               |                |   |                                           |                  |                                           |               |                                     |   |                   |           |              |          |                |    |                    |       |                    |    |                  |    |                       |    |                |    |       |
| 42 | race<br>Show the field ONLY if:<br>[exclude] = '0'                           | Is race/ethnicity of abused children and/or non-offending family members mentioned in this paper? |  | yesno<br><table border="1"> <tr><td>1</td><td>Yes</td></tr> <tr><td>0</td><td>No</td></tr> </table>                                                                                                                                                                                                                                                                                                                                                                                                                                                                                                                                                                                                                                                                                            | 1 | Yes           | 0                | No          |               |                |   |                                           |                  |                                           |               |                                     |   |                   |           |              |          |                |    |                    |       |                    |    |                  |    |                       |    |                |    |       |
| 1  | Yes                                                                          |                                                                                                   |  |                                                                                                                                                                                                                                                                                                                                                                                                                                                                                                                                                                                                                                                                                                                                                                                                |   |               |                  |             |               |                |   |                                           |                  |                                           |               |                                     |   |                   |           |              |          |                |    |                    |       |                    |    |                  |    |                       |    |                |    |       |
| 0  | No                                                                           |                                                                                                   |  |                                                                                                                                                                                                                                                                                                                                                                                                                                                                                                                                                                                                                                                                                                                                                                                                |   |               |                  |             |               |                |   |                                           |                  |                                           |               |                                     |   |                   |           |              |          |                |    |                    |       |                    |    |                  |    |                       |    |                |    |       |
| 43 | race2<br>Show the field ONLY if:<br>[exclude] = '0' and [race]= '1'          | Please select from the following, you may select more than one.                                   |  | checkbox<br><table border="1"> <tr><td>1</td><td>race2__1</td><td>African American</td></tr> <tr><td>2</td><td>race2__2</td><td>Asian American</td></tr> <tr><td>3</td><td>race2__3</td><td>Pacific Islander</td></tr> <tr><td>4</td><td>race2__4</td><td>Native American</td></tr> <tr><td>5</td><td>race2__5</td><td>Caucasian</td></tr> <tr><td>6</td><td>race2__6</td><td>Hispanic</td></tr> <tr><td>7</td><td>race2__7</td><td>Other</td></tr> </table>                                                                                                                                                                                                                                                                                                                                   | 1 | race2__1      | African American | 2           | race2__2      | Asian American | 3 | race2__3                                  | Pacific Islander | 4                                         | race2__4      | Native American                     | 5 | race2__5          | Caucasian | 6            | race2__6 | Hispanic       | 7  | race2__7           | Other |                    |    |                  |    |                       |    |                |    |       |
| 1  | race2__1                                                                     | African American                                                                                  |  |                                                                                                                                                                                                                                                                                                                                                                                                                                                                                                                                                                                                                                                                                                                                                                                                |   |               |                  |             |               |                |   |                                           |                  |                                           |               |                                     |   |                   |           |              |          |                |    |                    |       |                    |    |                  |    |                       |    |                |    |       |
| 2  | race2__2                                                                     | Asian American                                                                                    |  |                                                                                                                                                                                                                                                                                                                                                                                                                                                                                                                                                                                                                                                                                                                                                                                                |   |               |                  |             |               |                |   |                                           |                  |                                           |               |                                     |   |                   |           |              |          |                |    |                    |       |                    |    |                  |    |                       |    |                |    |       |
| 3  | race2__3                                                                     | Pacific Islander                                                                                  |  |                                                                                                                                                                                                                                                                                                                                                                                                                                                                                                                                                                                                                                                                                                                                                                                                |   |               |                  |             |               |                |   |                                           |                  |                                           |               |                                     |   |                   |           |              |          |                |    |                    |       |                    |    |                  |    |                       |    |                |    |       |
| 4  | race2__4                                                                     | Native American                                                                                   |  |                                                                                                                                                                                                                                                                                                                                                                                                                                                                                                                                                                                                                                                                                                                                                                                                |   |               |                  |             |               |                |   |                                           |                  |                                           |               |                                     |   |                   |           |              |          |                |    |                    |       |                    |    |                  |    |                       |    |                |    |       |
| 5  | race2__5                                                                     | Caucasian                                                                                         |  |                                                                                                                                                                                                                                                                                                                                                                                                                                                                                                                                                                                                                                                                                                                                                                                                |   |               |                  |             |               |                |   |                                           |                  |                                           |               |                                     |   |                   |           |              |          |                |    |                    |       |                    |    |                  |    |                       |    |                |    |       |
| 6  | race2__6                                                                     | Hispanic                                                                                          |  |                                                                                                                                                                                                                                                                                                                                                                                                                                                                                                                                                                                                                                                                                                                                                                                                |   |               |                  |             |               |                |   |                                           |                  |                                           |               |                                     |   |                   |           |              |          |                |    |                    |       |                    |    |                  |    |                       |    |                |    |       |
| 7  | race2__7                                                                     | Other                                                                                             |  |                                                                                                                                                                                                                                                                                                                                                                                                                                                                                                                                                                                                                                                                                                                                                                                                |   |               |                  |             |               |                |   |                                           |                  |                                           |               |                                     |   |                   |           |              |          |                |    |                    |       |                    |    |                  |    |                       |    |                |    |       |
| 44 | other_race<br>Show the field ONLY if:<br>[exclude] = '0' and [race2(7)]= '1' | other:                                                                                            |  | text                                                                                                                                                                                                                                                                                                                                                                                                                                                                                                                                                                                                                                                                                                                                                                                           |   |               |                  |             |               |                |   |                                           |                  |                                           |               |                                     |   |                   |           |              |          |                |    |                    |       |                    |    |                  |    |                       |    |                |    |       |
| 45 | design<br>Show the field ONLY if:<br>[exclude] = '0'                         | Section Header: <i>METHODS</i><br>What is the primary design of the paper:                        |  | radio<br><table border="1"> <tr><td>1</td><td>Quantitative</td></tr> <tr><td>2</td><td>Qualitative</td></tr> <tr><td>3</td><td>Mixed approach</td></tr> <tr><td>4</td><td>Concept or framework paper (not research)</td></tr> <tr><td>5</td><td>Review of literature paper (not research)</td></tr> <tr><td>6</td><td>Review of a guideline or a protocol</td></tr> <tr><td>7</td><td>Systematic review</td></tr> <tr><td>8</td><td>Metaanalysis</td></tr> <tr><td>9</td><td>Scoping review</td></tr> <tr><td>10</td><td>Integrative review</td></tr> <tr><td>11</td><td>Case report/review</td></tr> <tr><td>12</td><td>Narrative review</td></tr> <tr><td>13</td><td>Doctoral dissertation</td></tr> <tr><td>14</td><td>Masters thesis</td></tr> <tr><td>15</td><td>Other</td></tr> </table> | 1 | Quantitative  | 2                | Qualitative | 3             | Mixed approach | 4 | Concept or framework paper (not research) | 5                | Review of literature paper (not research) | 6             | Review of a guideline or a protocol | 7 | Systematic review | 8         | Metaanalysis | 9        | Scoping review | 10 | Integrative review | 11    | Case report/review | 12 | Narrative review | 13 | Doctoral dissertation | 14 | Masters thesis | 15 | Other |
| 1  | Quantitative                                                                 |                                                                                                   |  |                                                                                                                                                                                                                                                                                                                                                                                                                                                                                                                                                                                                                                                                                                                                                                                                |   |               |                  |             |               |                |   |                                           |                  |                                           |               |                                     |   |                   |           |              |          |                |    |                    |       |                    |    |                  |    |                       |    |                |    |       |
| 2  | Qualitative                                                                  |                                                                                                   |  |                                                                                                                                                                                                                                                                                                                                                                                                                                                                                                                                                                                                                                                                                                                                                                                                |   |               |                  |             |               |                |   |                                           |                  |                                           |               |                                     |   |                   |           |              |          |                |    |                    |       |                    |    |                  |    |                       |    |                |    |       |
| 3  | Mixed approach                                                               |                                                                                                   |  |                                                                                                                                                                                                                                                                                                                                                                                                                                                                                                                                                                                                                                                                                                                                                                                                |   |               |                  |             |               |                |   |                                           |                  |                                           |               |                                     |   |                   |           |              |          |                |    |                    |       |                    |    |                  |    |                       |    |                |    |       |
| 4  | Concept or framework paper (not research)                                    |                                                                                                   |  |                                                                                                                                                                                                                                                                                                                                                                                                                                                                                                                                                                                                                                                                                                                                                                                                |   |               |                  |             |               |                |   |                                           |                  |                                           |               |                                     |   |                   |           |              |          |                |    |                    |       |                    |    |                  |    |                       |    |                |    |       |
| 5  | Review of literature paper (not research)                                    |                                                                                                   |  |                                                                                                                                                                                                                                                                                                                                                                                                                                                                                                                                                                                                                                                                                                                                                                                                |   |               |                  |             |               |                |   |                                           |                  |                                           |               |                                     |   |                   |           |              |          |                |    |                    |       |                    |    |                  |    |                       |    |                |    |       |
| 6  | Review of a guideline or a protocol                                          |                                                                                                   |  |                                                                                                                                                                                                                                                                                                                                                                                                                                                                                                                                                                                                                                                                                                                                                                                                |   |               |                  |             |               |                |   |                                           |                  |                                           |               |                                     |   |                   |           |              |          |                |    |                    |       |                    |    |                  |    |                       |    |                |    |       |
| 7  | Systematic review                                                            |                                                                                                   |  |                                                                                                                                                                                                                                                                                                                                                                                                                                                                                                                                                                                                                                                                                                                                                                                                |   |               |                  |             |               |                |   |                                           |                  |                                           |               |                                     |   |                   |           |              |          |                |    |                    |       |                    |    |                  |    |                       |    |                |    |       |
| 8  | Metaanalysis                                                                 |                                                                                                   |  |                                                                                                                                                                                                                                                                                                                                                                                                                                                                                                                                                                                                                                                                                                                                                                                                |   |               |                  |             |               |                |   |                                           |                  |                                           |               |                                     |   |                   |           |              |          |                |    |                    |       |                    |    |                  |    |                       |    |                |    |       |
| 9  | Scoping review                                                               |                                                                                                   |  |                                                                                                                                                                                                                                                                                                                                                                                                                                                                                                                                                                                                                                                                                                                                                                                                |   |               |                  |             |               |                |   |                                           |                  |                                           |               |                                     |   |                   |           |              |          |                |    |                    |       |                    |    |                  |    |                       |    |                |    |       |
| 10 | Integrative review                                                           |                                                                                                   |  |                                                                                                                                                                                                                                                                                                                                                                                                                                                                                                                                                                                                                                                                                                                                                                                                |   |               |                  |             |               |                |   |                                           |                  |                                           |               |                                     |   |                   |           |              |          |                |    |                    |       |                    |    |                  |    |                       |    |                |    |       |
| 11 | Case report/review                                                           |                                                                                                   |  |                                                                                                                                                                                                                                                                                                                                                                                                                                                                                                                                                                                                                                                                                                                                                                                                |   |               |                  |             |               |                |   |                                           |                  |                                           |               |                                     |   |                   |           |              |          |                |    |                    |       |                    |    |                  |    |                       |    |                |    |       |
| 12 | Narrative review                                                             |                                                                                                   |  |                                                                                                                                                                                                                                                                                                                                                                                                                                                                                                                                                                                                                                                                                                                                                                                                |   |               |                  |             |               |                |   |                                           |                  |                                           |               |                                     |   |                   |           |              |          |                |    |                    |       |                    |    |                  |    |                       |    |                |    |       |
| 13 | Doctoral dissertation                                                        |                                                                                                   |  |                                                                                                                                                                                                                                                                                                                                                                                                                                                                                                                                                                                                                                                                                                                                                                                                |   |               |                  |             |               |                |   |                                           |                  |                                           |               |                                     |   |                   |           |              |          |                |    |                    |       |                    |    |                  |    |                       |    |                |    |       |
| 14 | Masters thesis                                                               |                                                                                                   |  |                                                                                                                                                                                                                                                                                                                                                                                                                                                                                                                                                                                                                                                                                                                                                                                                |   |               |                  |             |               |                |   |                                           |                  |                                           |               |                                     |   |                   |           |              |          |                |    |                    |       |                    |    |                  |    |                       |    |                |    |       |
| 15 | Other                                                                        |                                                                                                   |  |                                                                                                                                                                                                                                                                                                                                                                                                                                                                                                                                                                                                                                                                                                                                                                                                |   |               |                  |             |               |                |   |                                           |                  |                                           |               |                                     |   |                   |           |              |          |                |    |                    |       |                    |    |                  |    |                       |    |                |    |       |
| 46 | design_other                                                                 | Other:                                                                                            |  | text                                                                                                                                                                                                                                                                                                                                                                                                                                                                                                                                                                                                                                                                                                                                                                                           |   |               |                  |             |               |                |   |                                           |                  |                                           |               |                                     |   |                   |           |              |          |                |    |                    |       |                    |    |                  |    |                       |    |                |    |       |

|    |                                            |                                                                   |                                                                                                                               |                                                                                                                                                                                                                                                                                                                                                             |   |                                         |   |                                            |   |                                       |   |                       |   |                    |   |       |
|----|--------------------------------------------|-------------------------------------------------------------------|-------------------------------------------------------------------------------------------------------------------------------|-------------------------------------------------------------------------------------------------------------------------------------------------------------------------------------------------------------------------------------------------------------------------------------------------------------------------------------------------------------|---|-----------------------------------------|---|--------------------------------------------|---|---------------------------------------|---|-----------------------|---|--------------------|---|-------|
|    |                                            | Show the field ONLY if:<br>[exclude] = '0' and [design]='15'      |                                                                                                                               |                                                                                                                                                                                                                                                                                                                                                             |   |                                         |   |                                            |   |                                       |   |                       |   |                    |   |       |
| 47 | quant_type                                 | Show the field ONLY if:<br>[design]= '1' and [exclude] = '0'      | Quantitative design:                                                                                                          | radio<br><table border="1"> <tr><td>1</td><td>Randomized Control Trial</td></tr> <tr><td>2</td><td>Quasi-experiemental (not randomized trial)</td></tr> <tr><td>3</td><td>Longitudinal (cohort study)</td></tr> <tr><td>4</td><td>Cross-sectional study</td></tr> <tr><td>5</td><td>Case control study</td></tr> <tr><td>6</td><td>Other</td></tr> </table> | 1 | Randomized Control Trial                | 2 | Quasi-experiemental (not randomized trial) | 3 | Longitudinal (cohort study)           | 4 | Cross-sectional study | 5 | Case control study | 6 | Other |
| 1  | Randomized Control Trial                   |                                                                   |                                                                                                                               |                                                                                                                                                                                                                                                                                                                                                             |   |                                         |   |                                            |   |                                       |   |                       |   |                    |   |       |
| 2  | Quasi-experiemental (not randomized trial) |                                                                   |                                                                                                                               |                                                                                                                                                                                                                                                                                                                                                             |   |                                         |   |                                            |   |                                       |   |                       |   |                    |   |       |
| 3  | Longitudinal (cohort study)                |                                                                   |                                                                                                                               |                                                                                                                                                                                                                                                                                                                                                             |   |                                         |   |                                            |   |                                       |   |                       |   |                    |   |       |
| 4  | Cross-sectional study                      |                                                                   |                                                                                                                               |                                                                                                                                                                                                                                                                                                                                                             |   |                                         |   |                                            |   |                                       |   |                       |   |                    |   |       |
| 5  | Case control study                         |                                                                   |                                                                                                                               |                                                                                                                                                                                                                                                                                                                                                             |   |                                         |   |                                            |   |                                       |   |                       |   |                    |   |       |
| 6  | Other                                      |                                                                   |                                                                                                                               |                                                                                                                                                                                                                                                                                                                                                             |   |                                         |   |                                            |   |                                       |   |                       |   |                    |   |       |
| 48 | quant_other                                | Show the field ONLY if:<br>[quant_type] = '6' and [exclude] = '0' | Other:                                                                                                                        | text                                                                                                                                                                                                                                                                                                                                                        |   |                                         |   |                                            |   |                                       |   |                       |   |                    |   |       |
| 49 | variables                                  | Show the field ONLY if:<br>[design]= '1' and [exclude] = '0'      | Study variables:                                                                                                              | notes                                                                                                                                                                                                                                                                                                                                                       |   |                                         |   |                                            |   |                                       |   |                       |   |                    |   |       |
| 50 | qual_type                                  | Show the field ONLY if:<br>[exclude] = '0'                        | Qualitative design:                                                                                                           | radio<br><table border="1"> <tr><td>1</td><td>Narrative inquiry</td></tr> <tr><td>2</td><td>Ethnography</td></tr> <tr><td>3</td><td>Phenomenology</td></tr> <tr><td>4</td><td>Action research</td></tr> <tr><td>5</td><td>Other</td></tr> </table>                                                                                                          | 1 | Narrative inquiry                       | 2 | Ethnography                                | 3 | Phenomenology                         | 4 | Action research       | 5 | Other              |   |       |
| 1  | Narrative inquiry                          |                                                                   |                                                                                                                               |                                                                                                                                                                                                                                                                                                                                                             |   |                                         |   |                                            |   |                                       |   |                       |   |                    |   |       |
| 2  | Ethnography                                |                                                                   |                                                                                                                               |                                                                                                                                                                                                                                                                                                                                                             |   |                                         |   |                                            |   |                                       |   |                       |   |                    |   |       |
| 3  | Phenomenology                              |                                                                   |                                                                                                                               |                                                                                                                                                                                                                                                                                                                                                             |   |                                         |   |                                            |   |                                       |   |                       |   |                    |   |       |
| 4  | Action research                            |                                                                   |                                                                                                                               |                                                                                                                                                                                                                                                                                                                                                             |   |                                         |   |                                            |   |                                       |   |                       |   |                    |   |       |
| 5  | Other                                      |                                                                   |                                                                                                                               |                                                                                                                                                                                                                                                                                                                                                             |   |                                         |   |                                            |   |                                       |   |                       |   |                    |   |       |
| 51 | quanl_other                                | Show the field ONLY if:<br>[qual_type] = '5' and [exclude] = '0'  | Other:                                                                                                                        | text                                                                                                                                                                                                                                                                                                                                                        |   |                                         |   |                                            |   |                                       |   |                       |   |                    |   |       |
| 52 | mixed_type                                 | Show the field ONLY if:<br>[exclude] = '0'                        | Mixed methods:                                                                                                                | radio<br><table border="1"> <tr><td>1</td><td>Sequential explanatory (quant --&gt; qual)</td></tr> <tr><td>2</td><td>Sequential exploratory (qual --&gt; quant)</td></tr> <tr><td>3</td><td>Concurrent triangulation (integrated)</td></tr> <tr><td>4</td><td>Other</td></tr> </table>                                                                      | 1 | Sequential explanatory (quant --> qual) | 2 | Sequential exploratory (qual --> quant)    | 3 | Concurrent triangulation (integrated) | 4 | Other                 |   |                    |   |       |
| 1  | Sequential explanatory (quant --> qual)    |                                                                   |                                                                                                                               |                                                                                                                                                                                                                                                                                                                                                             |   |                                         |   |                                            |   |                                       |   |                       |   |                    |   |       |
| 2  | Sequential exploratory (qual --> quant)    |                                                                   |                                                                                                                               |                                                                                                                                                                                                                                                                                                                                                             |   |                                         |   |                                            |   |                                       |   |                       |   |                    |   |       |
| 3  | Concurrent triangulation (integrated)      |                                                                   |                                                                                                                               |                                                                                                                                                                                                                                                                                                                                                             |   |                                         |   |                                            |   |                                       |   |                       |   |                    |   |       |
| 4  | Other                                      |                                                                   |                                                                                                                               |                                                                                                                                                                                                                                                                                                                                                             |   |                                         |   |                                            |   |                                       |   |                       |   |                    |   |       |
| 53 | quanl_other_2                              | Show the field ONLY if:<br>[mixed_type] = '4' and [exclude] = '0' | Other:                                                                                                                        | text                                                                                                                                                                                                                                                                                                                                                        |   |                                         |   |                                            |   |                                       |   |                       |   |                    |   |       |
| 54 | impl_science                               | Show the field ONLY if:<br>[exclude] = '0'                        | Does this paper refer to implementation science or implementation research?                                                   | radio<br><table border="1"> <tr><td>1</td><td>Yes</td></tr> <tr><td>0</td><td>No</td></tr> <tr><td>3</td><td>Don't know</td></tr> </table>                                                                                                                                                                                                                  | 1 | Yes                                     | 0 | No                                         | 3 | Don't know                            |   |                       |   |                    |   |       |
| 1  | Yes                                        |                                                                   |                                                                                                                               |                                                                                                                                                                                                                                                                                                                                                             |   |                                         |   |                                            |   |                                       |   |                       |   |                    |   |       |
| 0  | No                                         |                                                                   |                                                                                                                               |                                                                                                                                                                                                                                                                                                                                                             |   |                                         |   |                                            |   |                                       |   |                       |   |                    |   |       |
| 3  | Don't know                                 |                                                                   |                                                                                                                               |                                                                                                                                                                                                                                                                                                                                                             |   |                                         |   |                                            |   |                                       |   |                       |   |                    |   |       |
| 55 | sample_size                                | Show the field ONLY if:<br>[exclude] = '0'                        | Sample size:                                                                                                                  | text                                                                                                                                                                                                                                                                                                                                                        |   |                                         |   |                                            |   |                                       |   |                       |   |                    |   |       |
| 56 | shared_data                                | Show the field ONLY if:<br>[exclude] = '0'                        | Does this paper refer to any types of shared data sources, databases, or integrated data, linked data, or health information? | yesno<br><table border="1"> <tr><td>1</td><td>Yes</td></tr> <tr><td>0</td><td>No</td></tr> </table>                                                                                                                                                                                                                                                         | 1 | Yes                                     | 0 | No                                         |   |                                       |   |                       |   |                    |   |       |
| 1  | Yes                                        |                                                                   |                                                                                                                               |                                                                                                                                                                                                                                                                                                                                                             |   |                                         |   |                                            |   |                                       |   |                       |   |                    |   |       |
| 0  | No                                         |                                                                   |                                                                                                                               |                                                                                                                                                                                                                                                                                                                                                             |   |                                         |   |                                            |   |                                       |   |                       |   |                    |   |       |
| 57 | shared_data2                               | Show the field ONLY if:<br>"shared_data"='1' and [exclude] = '0'  | Details about data:                                                                                                           | notes                                                                                                                                                                                                                                                                                                                                                       |   |                                         |   |                                            |   |                                       |   |                       |   |                    |   |       |

|    |                                                                                                                            |                                                                                                             |                                                                                                                                                                                                                                                                                                 |   |          |   |               |   |             |   |                      |   |               |   |       |
|----|----------------------------------------------------------------------------------------------------------------------------|-------------------------------------------------------------------------------------------------------------|-------------------------------------------------------------------------------------------------------------------------------------------------------------------------------------------------------------------------------------------------------------------------------------------------|---|----------|---|---------------|---|-------------|---|----------------------|---|---------------|---|-------|
| 58 | <p>outcomes_yn</p> <p>Show the field ONLY if:<br/>[exclude] = '0'</p>                                                      | <p>Section Header: <i>OUTCOMES (directly related to people)</i></p> <p>Does the paper address outcomes?</p> | <p>yesno</p> <table border="1"> <tr> <td>1</td> <td>Yes</td> </tr> <tr> <td>0</td> <td>No</td> </tr> </table>                                                                                                                                                                                   | 1 | Yes      | 0 | No            |   |             |   |                      |   |               |   |       |
| 1  | Yes                                                                                                                        |                                                                                                             |                                                                                                                                                                                                                                                                                                 |   |          |   |               |   |             |   |                      |   |               |   |       |
| 0  | No                                                                                                                         |                                                                                                             |                                                                                                                                                                                                                                                                                                 |   |          |   |               |   |             |   |                      |   |               |   |       |
| 59 | <p>outcome</p> <p>Show the field ONLY if:<br/>[outcomes_yn]='1' and [exclude] = '0'</p>                                    | <p>Outcome 1:</p>                                                                                           | <p>notes</p>                                                                                                                                                                                                                                                                                    |   |          |   |               |   |             |   |                      |   |               |   |       |
| 60 | <p>operational_def</p> <p>Show the field ONLY if:<br/>[outcomes_yn]='1' and [exclude] = '0'</p>                            | <p>What is the operational definition/ How is this outcome measured?</p>                                    | <p>notes</p>                                                                                                                                                                                                                                                                                    |   |          |   |               |   |             |   |                      |   |               |   |       |
| 61 | <p>subject</p> <p>Show the field ONLY if:<br/>[outcomes_yn]='1' and [exclude] = '0'</p>                                    | <p>Who is the main subject of this outcome?</p>                                                             | <p>radio</p> <table border="1"> <tr> <td>1</td> <td>Child</td> </tr> <tr> <td>2</td> <td>Family Member</td> </tr> <tr> <td>3</td> <td>Family unit</td> </tr> <tr> <td>4</td> <td>CAC Staff/MDT Member</td> </tr> <tr> <td>5</td> <td>Other</td> </tr> </table>                                  | 1 | Child    | 2 | Family Member | 3 | Family unit | 4 | CAC Staff/MDT Member | 5 | Other         |   |       |
| 1  | Child                                                                                                                      |                                                                                                             |                                                                                                                                                                                                                                                                                                 |   |          |   |               |   |             |   |                      |   |               |   |       |
| 2  | Family Member                                                                                                              |                                                                                                             |                                                                                                                                                                                                                                                                                                 |   |          |   |               |   |             |   |                      |   |               |   |       |
| 3  | Family unit                                                                                                                |                                                                                                             |                                                                                                                                                                                                                                                                                                 |   |          |   |               |   |             |   |                      |   |               |   |       |
| 4  | CAC Staff/MDT Member                                                                                                       |                                                                                                             |                                                                                                                                                                                                                                                                                                 |   |          |   |               |   |             |   |                      |   |               |   |       |
| 5  | Other                                                                                                                      |                                                                                                             |                                                                                                                                                                                                                                                                                                 |   |          |   |               |   |             |   |                      |   |               |   |       |
| 62 | <p>outcome_type</p> <p>Show the field ONLY if:<br/>[outcomes_yn]='1' and [exclude] = '0'</p>                               | <p>Type of outcome:</p>                                                                                     | <p>radio</p> <table border="1"> <tr> <td>1</td> <td>Economic</td> </tr> <tr> <td>2</td> <td>Academic</td> </tr> <tr> <td>3</td> <td>Policy</td> </tr> <tr> <td>4</td> <td>Physical Health</td> </tr> <tr> <td>5</td> <td>Mental Health</td> </tr> <tr> <td>6</td> <td>Other</td> </tr> </table> | 1 | Economic | 2 | Academic      | 3 | Policy      | 4 | Physical Health      | 5 | Mental Health | 6 | Other |
| 1  | Economic                                                                                                                   |                                                                                                             |                                                                                                                                                                                                                                                                                                 |   |          |   |               |   |             |   |                      |   |               |   |       |
| 2  | Academic                                                                                                                   |                                                                                                             |                                                                                                                                                                                                                                                                                                 |   |          |   |               |   |             |   |                      |   |               |   |       |
| 3  | Policy                                                                                                                     |                                                                                                             |                                                                                                                                                                                                                                                                                                 |   |          |   |               |   |             |   |                      |   |               |   |       |
| 4  | Physical Health                                                                                                            |                                                                                                             |                                                                                                                                                                                                                                                                                                 |   |          |   |               |   |             |   |                      |   |               |   |       |
| 5  | Mental Health                                                                                                              |                                                                                                             |                                                                                                                                                                                                                                                                                                 |   |          |   |               |   |             |   |                      |   |               |   |       |
| 6  | Other                                                                                                                      |                                                                                                             |                                                                                                                                                                                                                                                                                                 |   |          |   |               |   |             |   |                      |   |               |   |       |
| 63 | <p>outcome_other</p> <p>Show the field ONLY if:<br/>[outcome_type]='6' and [exclude]='0'</p>                               | <p>Other:</p>                                                                                               | <p>text</p>                                                                                                                                                                                                                                                                                     |   |          |   |               |   |             |   |                      |   |               |   |       |
| 64 | <p>outcome2</p> <p>Show the field ONLY if:<br/>[outcomes_yn]='1' and [exclude] = '0' and [outcome] &lt;&gt; "</p>          | <p>Outcome 2:</p>                                                                                           | <p>notes</p>                                                                                                                                                                                                                                                                                    |   |          |   |               |   |             |   |                      |   |               |   |       |
| 65 | <p>operational_def2</p> <p>Show the field ONLY if:<br/>[outcomes_yn]='1' and [exclude] = '0' and [outcome2] &lt;&gt; "</p> | <p>What is the operational definition/ How is this outcome measured?</p>                                    | <p>notes</p>                                                                                                                                                                                                                                                                                    |   |          |   |               |   |             |   |                      |   |               |   |       |
| 66 | <p>subject2</p> <p>Show the field ONLY if:<br/>[outcomes_yn]='1' and [exclude] = '0' and [outcome2] &lt;&gt; "</p>         | <p>Who is the main subject of this outcome?</p>                                                             | <p>radio</p> <table border="1"> <tr> <td>1</td> <td>Child</td> </tr> <tr> <td>2</td> <td>Family Member</td> </tr> <tr> <td>3</td> <td>Family unit</td> </tr> <tr> <td>4</td> <td>CAC Staff/MDT Member</td> </tr> <tr> <td>5</td> <td>Other</td> </tr> </table>                                  | 1 | Child    | 2 | Family Member | 3 | Family unit | 4 | CAC Staff/MDT Member | 5 | Other         |   |       |
| 1  | Child                                                                                                                      |                                                                                                             |                                                                                                                                                                                                                                                                                                 |   |          |   |               |   |             |   |                      |   |               |   |       |
| 2  | Family Member                                                                                                              |                                                                                                             |                                                                                                                                                                                                                                                                                                 |   |          |   |               |   |             |   |                      |   |               |   |       |
| 3  | Family unit                                                                                                                |                                                                                                             |                                                                                                                                                                                                                                                                                                 |   |          |   |               |   |             |   |                      |   |               |   |       |
| 4  | CAC Staff/MDT Member                                                                                                       |                                                                                                             |                                                                                                                                                                                                                                                                                                 |   |          |   |               |   |             |   |                      |   |               |   |       |
| 5  | Other                                                                                                                      |                                                                                                             |                                                                                                                                                                                                                                                                                                 |   |          |   |               |   |             |   |                      |   |               |   |       |
| 67 | <p>outcome_type2</p> <p>Show the field ONLY if:<br/>[outcomes_yn]='1' and [exclude] = '0' and [outcome2] &lt;&gt; "</p>    | <p>Type of outcome:</p>                                                                                     | <p>radio</p> <table border="1"> <tr> <td>1</td> <td>Economic</td> </tr> <tr> <td>2</td> <td>Academic</td> </tr> <tr> <td>3</td> <td>Policy</td> </tr> <tr> <td>4</td> <td>Physical Health</td> </tr> <tr> <td>5</td> <td>Mental Health</td> </tr> <tr> <td>6</td> <td>Other</td> </tr> </table> | 1 | Economic | 2 | Academic      | 3 | Policy      | 4 | Physical Health      | 5 | Mental Health | 6 | Other |
| 1  | Economic                                                                                                                   |                                                                                                             |                                                                                                                                                                                                                                                                                                 |   |          |   |               |   |             |   |                      |   |               |   |       |
| 2  | Academic                                                                                                                   |                                                                                                             |                                                                                                                                                                                                                                                                                                 |   |          |   |               |   |             |   |                      |   |               |   |       |
| 3  | Policy                                                                                                                     |                                                                                                             |                                                                                                                                                                                                                                                                                                 |   |          |   |               |   |             |   |                      |   |               |   |       |
| 4  | Physical Health                                                                                                            |                                                                                                             |                                                                                                                                                                                                                                                                                                 |   |          |   |               |   |             |   |                      |   |               |   |       |
| 5  | Mental Health                                                                                                              |                                                                                                             |                                                                                                                                                                                                                                                                                                 |   |          |   |               |   |             |   |                      |   |               |   |       |
| 6  | Other                                                                                                                      |                                                                                                             |                                                                                                                                                                                                                                                                                                 |   |          |   |               |   |             |   |                      |   |               |   |       |

|    |                                                                                                          |                                                                   |                                                                                                                                                                                                                                                                           |   |          |   |               |   |             |   |                      |   |               |   |       |
|----|----------------------------------------------------------------------------------------------------------|-------------------------------------------------------------------|---------------------------------------------------------------------------------------------------------------------------------------------------------------------------------------------------------------------------------------------------------------------------|---|----------|---|---------------|---|-------------|---|----------------------|---|---------------|---|-------|
| 68 | outcome_other2<br>Show the field ONLY if:<br>[outcome_type2]='6' and [exclude]='0'                       | Other:                                                            | text                                                                                                                                                                                                                                                                      |   |          |   |               |   |             |   |                      |   |               |   |       |
| 69 | outcome3<br>Show the field ONLY if:<br>[outcomes_yn]='1' and [exclude] = '0' and [outcome2] <> "         | Outcome 3:                                                        | notes                                                                                                                                                                                                                                                                     |   |          |   |               |   |             |   |                      |   |               |   |       |
| 70 | operational_def3<br>Show the field ONLY if:<br>[outcomes_yn]='1' and [exclude] = '0' and [outcome3] <> " | What is the operational definition/ How is this outcome measured? | notes                                                                                                                                                                                                                                                                     |   |          |   |               |   |             |   |                      |   |               |   |       |
| 71 | subject3<br>Show the field ONLY if:<br>[outcomes_yn]='1' and [exclude] = '0' and [outcome3] <> "         | Who is the main subject of this outcome?                          | radio<br><table border="1"> <tr><td>1</td><td>Child</td></tr> <tr><td>2</td><td>Family Member</td></tr> <tr><td>3</td><td>Family unit</td></tr> <tr><td>4</td><td>CAC Staff/MDT Member</td></tr> <tr><td>5</td><td>Other</td></tr> </table>                               | 1 | Child    | 2 | Family Member | 3 | Family unit | 4 | CAC Staff/MDT Member | 5 | Other         |   |       |
| 1  | Child                                                                                                    |                                                                   |                                                                                                                                                                                                                                                                           |   |          |   |               |   |             |   |                      |   |               |   |       |
| 2  | Family Member                                                                                            |                                                                   |                                                                                                                                                                                                                                                                           |   |          |   |               |   |             |   |                      |   |               |   |       |
| 3  | Family unit                                                                                              |                                                                   |                                                                                                                                                                                                                                                                           |   |          |   |               |   |             |   |                      |   |               |   |       |
| 4  | CAC Staff/MDT Member                                                                                     |                                                                   |                                                                                                                                                                                                                                                                           |   |          |   |               |   |             |   |                      |   |               |   |       |
| 5  | Other                                                                                                    |                                                                   |                                                                                                                                                                                                                                                                           |   |          |   |               |   |             |   |                      |   |               |   |       |
| 72 | outcome_type3<br>Show the field ONLY if:<br>[outcomes_yn]='1' and [exclude] = '0' and [outcome3] <> "    | Type of outcome:                                                  | radio<br><table border="1"> <tr><td>1</td><td>Economic</td></tr> <tr><td>2</td><td>Academic</td></tr> <tr><td>3</td><td>Policy</td></tr> <tr><td>4</td><td>Physical Health</td></tr> <tr><td>5</td><td>Mental Health</td></tr> <tr><td>6</td><td>Other</td></tr> </table> | 1 | Economic | 2 | Academic      | 3 | Policy      | 4 | Physical Health      | 5 | Mental Health | 6 | Other |
| 1  | Economic                                                                                                 |                                                                   |                                                                                                                                                                                                                                                                           |   |          |   |               |   |             |   |                      |   |               |   |       |
| 2  | Academic                                                                                                 |                                                                   |                                                                                                                                                                                                                                                                           |   |          |   |               |   |             |   |                      |   |               |   |       |
| 3  | Policy                                                                                                   |                                                                   |                                                                                                                                                                                                                                                                           |   |          |   |               |   |             |   |                      |   |               |   |       |
| 4  | Physical Health                                                                                          |                                                                   |                                                                                                                                                                                                                                                                           |   |          |   |               |   |             |   |                      |   |               |   |       |
| 5  | Mental Health                                                                                            |                                                                   |                                                                                                                                                                                                                                                                           |   |          |   |               |   |             |   |                      |   |               |   |       |
| 6  | Other                                                                                                    |                                                                   |                                                                                                                                                                                                                                                                           |   |          |   |               |   |             |   |                      |   |               |   |       |
| 73 | outcome_other3<br>Show the field ONLY if:<br>[outcome_type3]='6' and [exclude]='0'                       | Other:                                                            | text                                                                                                                                                                                                                                                                      |   |          |   |               |   |             |   |                      |   |               |   |       |
| 74 | outcome4<br>Show the field ONLY if:<br>[outcomes_yn]='1' and [exclude] = '0' and [outcome3] <> "         | Outcome 4:                                                        | notes                                                                                                                                                                                                                                                                     |   |          |   |               |   |             |   |                      |   |               |   |       |
| 75 | operational_def4<br>Show the field ONLY if:<br>[outcomes_yn]='1' and [exclude] = '0' and [outcome4] <> " | What is the operational definition/ How is this outcome measured? | notes                                                                                                                                                                                                                                                                     |   |          |   |               |   |             |   |                      |   |               |   |       |
| 76 | subject4<br>Show the field ONLY if:<br>[outcomes_yn]='1' and [exclude] = '0' and [outcome4] <> "         | Who is the main subject of this outcome?                          | radio<br><table border="1"> <tr><td>1</td><td>Child</td></tr> <tr><td>2</td><td>Family Member</td></tr> <tr><td>3</td><td>Family unit</td></tr> <tr><td>4</td><td>CAC Staff/MDT Member</td></tr> <tr><td>5</td><td>Other</td></tr> </table>                               | 1 | Child    | 2 | Family Member | 3 | Family unit | 4 | CAC Staff/MDT Member | 5 | Other         |   |       |
| 1  | Child                                                                                                    |                                                                   |                                                                                                                                                                                                                                                                           |   |          |   |               |   |             |   |                      |   |               |   |       |
| 2  | Family Member                                                                                            |                                                                   |                                                                                                                                                                                                                                                                           |   |          |   |               |   |             |   |                      |   |               |   |       |
| 3  | Family unit                                                                                              |                                                                   |                                                                                                                                                                                                                                                                           |   |          |   |               |   |             |   |                      |   |               |   |       |
| 4  | CAC Staff/MDT Member                                                                                     |                                                                   |                                                                                                                                                                                                                                                                           |   |          |   |               |   |             |   |                      |   |               |   |       |
| 5  | Other                                                                                                    |                                                                   |                                                                                                                                                                                                                                                                           |   |          |   |               |   |             |   |                      |   |               |   |       |
| 77 | outcome_type4<br>Show the field ONLY if:<br>[outcomes_yn]='1' and [exclude] = '0' and [outcome4] <> "    | Type of outcome:                                                  | radio<br><table border="1"> <tr><td>1</td><td>Economic</td></tr> <tr><td>2</td><td>Academic</td></tr> <tr><td>3</td><td>Policy</td></tr> <tr><td>4</td><td>Physical Health</td></tr> <tr><td>5</td><td>Mental Health</td></tr> <tr><td>6</td><td>Other</td></tr> </table> | 1 | Economic | 2 | Academic      | 3 | Policy      | 4 | Physical Health      | 5 | Mental Health | 6 | Other |
| 1  | Economic                                                                                                 |                                                                   |                                                                                                                                                                                                                                                                           |   |          |   |               |   |             |   |                      |   |               |   |       |
| 2  | Academic                                                                                                 |                                                                   |                                                                                                                                                                                                                                                                           |   |          |   |               |   |             |   |                      |   |               |   |       |
| 3  | Policy                                                                                                   |                                                                   |                                                                                                                                                                                                                                                                           |   |          |   |               |   |             |   |                      |   |               |   |       |
| 4  | Physical Health                                                                                          |                                                                   |                                                                                                                                                                                                                                                                           |   |          |   |               |   |             |   |                      |   |               |   |       |
| 5  | Mental Health                                                                                            |                                                                   |                                                                                                                                                                                                                                                                           |   |          |   |               |   |             |   |                      |   |               |   |       |
| 6  | Other                                                                                                    |                                                                   |                                                                                                                                                                                                                                                                           |   |          |   |               |   |             |   |                      |   |               |   |       |



|    |                                                                                                          |                                                                   |                                                                                                                                                                                                                                                                           |   |          |   |               |   |             |   |                      |   |               |   |       |
|----|----------------------------------------------------------------------------------------------------------|-------------------------------------------------------------------|---------------------------------------------------------------------------------------------------------------------------------------------------------------------------------------------------------------------------------------------------------------------------|---|----------|---|---------------|---|-------------|---|----------------------|---|---------------|---|-------|
| 78 | outcome_other4<br>Show the field ONLY if:<br>[outcome_type4]='6' and [exclude]='0'                       | Other:                                                            | text                                                                                                                                                                                                                                                                      |   |          |   |               |   |             |   |                      |   |               |   |       |
| 79 | outcome5<br>Show the field ONLY if:<br>[outcomes_yn]='1' and [exclude] = '0' and [outcome4] <> "         | Outcome 5:                                                        | notes                                                                                                                                                                                                                                                                     |   |          |   |               |   |             |   |                      |   |               |   |       |
| 80 | operational_def5<br>Show the field ONLY if:<br>[outcomes_yn]='1' and [exclude] = '0' and [outcome5] <> " | What is the operational definition/ How is this outcome measured? | notes                                                                                                                                                                                                                                                                     |   |          |   |               |   |             |   |                      |   |               |   |       |
| 81 | subject5<br>Show the field ONLY if:<br>[exclude] = '0' and [outcome5] <> "                               | Who is the main subject of this outcome?                          | radio<br><table border="1"> <tr><td>1</td><td>Child</td></tr> <tr><td>2</td><td>Family Member</td></tr> <tr><td>3</td><td>Family unit</td></tr> <tr><td>4</td><td>CAC Staff/MDT Member</td></tr> <tr><td>5</td><td>Other</td></tr> </table>                               | 1 | Child    | 2 | Family Member | 3 | Family unit | 4 | CAC Staff/MDT Member | 5 | Other         |   |       |
| 1  | Child                                                                                                    |                                                                   |                                                                                                                                                                                                                                                                           |   |          |   |               |   |             |   |                      |   |               |   |       |
| 2  | Family Member                                                                                            |                                                                   |                                                                                                                                                                                                                                                                           |   |          |   |               |   |             |   |                      |   |               |   |       |
| 3  | Family unit                                                                                              |                                                                   |                                                                                                                                                                                                                                                                           |   |          |   |               |   |             |   |                      |   |               |   |       |
| 4  | CAC Staff/MDT Member                                                                                     |                                                                   |                                                                                                                                                                                                                                                                           |   |          |   |               |   |             |   |                      |   |               |   |       |
| 5  | Other                                                                                                    |                                                                   |                                                                                                                                                                                                                                                                           |   |          |   |               |   |             |   |                      |   |               |   |       |
| 82 | outcome_type5<br>Show the field ONLY if:<br>[exclude] = '0' and [outcome5] <> "                          | Type of outcome:                                                  | radio<br><table border="1"> <tr><td>1</td><td>Economic</td></tr> <tr><td>2</td><td>Academic</td></tr> <tr><td>3</td><td>Policy</td></tr> <tr><td>4</td><td>Physical Health</td></tr> <tr><td>5</td><td>Mental Health</td></tr> <tr><td>6</td><td>Other</td></tr> </table> | 1 | Economic | 2 | Academic      | 3 | Policy      | 4 | Physical Health      | 5 | Mental Health | 6 | Other |
| 1  | Economic                                                                                                 |                                                                   |                                                                                                                                                                                                                                                                           |   |          |   |               |   |             |   |                      |   |               |   |       |
| 2  | Academic                                                                                                 |                                                                   |                                                                                                                                                                                                                                                                           |   |          |   |               |   |             |   |                      |   |               |   |       |
| 3  | Policy                                                                                                   |                                                                   |                                                                                                                                                                                                                                                                           |   |          |   |               |   |             |   |                      |   |               |   |       |
| 4  | Physical Health                                                                                          |                                                                   |                                                                                                                                                                                                                                                                           |   |          |   |               |   |             |   |                      |   |               |   |       |
| 5  | Mental Health                                                                                            |                                                                   |                                                                                                                                                                                                                                                                           |   |          |   |               |   |             |   |                      |   |               |   |       |
| 6  | Other                                                                                                    |                                                                   |                                                                                                                                                                                                                                                                           |   |          |   |               |   |             |   |                      |   |               |   |       |
| 83 | outcome_other5<br>Show the field ONLY if:<br>[outcome_type5]='6' and [exclude]='0'                       | Other:                                                            | text                                                                                                                                                                                                                                                                      |   |          |   |               |   |             |   |                      |   |               |   |       |
| 84 | outcome6<br>Show the field ONLY if:<br>[outcomes_yn]='1' and [exclude] = '0' and [outcome5] <> "         | Outcome 6:                                                        | notes                                                                                                                                                                                                                                                                     |   |          |   |               |   |             |   |                      |   |               |   |       |
| 85 | operational_def6<br>Show the field ONLY if:<br>[outcomes_yn]='1' and [exclude] = '0' and [outcome6] <> " | What is the operational definition/ How is this outcome measured? | notes                                                                                                                                                                                                                                                                     |   |          |   |               |   |             |   |                      |   |               |   |       |
| 86 | subject6<br>Show the field ONLY if:<br>[outcomes_yn]='1' and [exclude] = '0' and [outcome5] <> "         | Who is the main subject of this outcome?                          | radio<br><table border="1"> <tr><td>1</td><td>Child</td></tr> <tr><td>2</td><td>Family Member</td></tr> <tr><td>3</td><td>Family unit</td></tr> <tr><td>4</td><td>CAC Staff/MDT Member</td></tr> <tr><td>5</td><td>Other</td></tr> </table>                               | 1 | Child    | 2 | Family Member | 3 | Family unit | 4 | CAC Staff/MDT Member | 5 | Other         |   |       |
| 1  | Child                                                                                                    |                                                                   |                                                                                                                                                                                                                                                                           |   |          |   |               |   |             |   |                      |   |               |   |       |
| 2  | Family Member                                                                                            |                                                                   |                                                                                                                                                                                                                                                                           |   |          |   |               |   |             |   |                      |   |               |   |       |
| 3  | Family unit                                                                                              |                                                                   |                                                                                                                                                                                                                                                                           |   |          |   |               |   |             |   |                      |   |               |   |       |
| 4  | CAC Staff/MDT Member                                                                                     |                                                                   |                                                                                                                                                                                                                                                                           |   |          |   |               |   |             |   |                      |   |               |   |       |
| 5  | Other                                                                                                    |                                                                   |                                                                                                                                                                                                                                                                           |   |          |   |               |   |             |   |                      |   |               |   |       |
| 87 | outcome_type6<br>Show the field ONLY if:<br>[exclude] = '0' and [outcome6] <> "                          | Type of outcome:                                                  | radio<br><table border="1"> <tr><td>1</td><td>Economic</td></tr> <tr><td>2</td><td>Academic</td></tr> <tr><td>3</td><td>Policy</td></tr> <tr><td>4</td><td>Physical Health</td></tr> <tr><td>5</td><td>Mental Health</td></tr> <tr><td>6</td><td>Other</td></tr> </table> | 1 | Economic | 2 | Academic      | 3 | Policy      | 4 | Physical Health      | 5 | Mental Health | 6 | Other |
| 1  | Economic                                                                                                 |                                                                   |                                                                                                                                                                                                                                                                           |   |          |   |               |   |             |   |                      |   |               |   |       |
| 2  | Academic                                                                                                 |                                                                   |                                                                                                                                                                                                                                                                           |   |          |   |               |   |             |   |                      |   |               |   |       |
| 3  | Policy                                                                                                   |                                                                   |                                                                                                                                                                                                                                                                           |   |          |   |               |   |             |   |                      |   |               |   |       |
| 4  | Physical Health                                                                                          |                                                                   |                                                                                                                                                                                                                                                                           |   |          |   |               |   |             |   |                      |   |               |   |       |
| 5  | Mental Health                                                                                            |                                                                   |                                                                                                                                                                                                                                                                           |   |          |   |               |   |             |   |                      |   |               |   |       |
| 6  | Other                                                                                                    |                                                                   |                                                                                                                                                                                                                                                                           |   |          |   |               |   |             |   |                      |   |               |   |       |

|    |                                                                                                          |                                                                   |                                                                                                                                                                                                                                                                           |   |          |   |               |   |             |   |                      |   |               |   |       |
|----|----------------------------------------------------------------------------------------------------------|-------------------------------------------------------------------|---------------------------------------------------------------------------------------------------------------------------------------------------------------------------------------------------------------------------------------------------------------------------|---|----------|---|---------------|---|-------------|---|----------------------|---|---------------|---|-------|
| 88 | outcome_other6<br>Show the field ONLY if:<br>[outcome_type6]='6' and [exclude]='0'                       | Other:                                                            | text                                                                                                                                                                                                                                                                      |   |          |   |               |   |             |   |                      |   |               |   |       |
| 89 | outcome7<br>Show the field ONLY if:<br>[outcomes_yn]='1' and [exclude] = '0' and [outcome6] <> "         | Outcome 7:                                                        | notes                                                                                                                                                                                                                                                                     |   |          |   |               |   |             |   |                      |   |               |   |       |
| 90 | operational_def7<br>Show the field ONLY if:<br>[outcomes_yn]='1' and [exclude] = '0'                     | What is the operational definition/ How is this outcome measured? | notes                                                                                                                                                                                                                                                                     |   |          |   |               |   |             |   |                      |   |               |   |       |
| 91 | subject7<br>Show the field ONLY if:<br>[exclude] = '0' and [outcome7] <> "                               | Who is the main subject of this outcome?                          | radio<br><table border="1"> <tr><td>1</td><td>Child</td></tr> <tr><td>2</td><td>Family Member</td></tr> <tr><td>3</td><td>Family unit</td></tr> <tr><td>4</td><td>CAC Staff/MDT Member</td></tr> <tr><td>5</td><td>Other</td></tr> </table>                               | 1 | Child    | 2 | Family Member | 3 | Family unit | 4 | CAC Staff/MDT Member | 5 | Other         |   |       |
| 1  | Child                                                                                                    |                                                                   |                                                                                                                                                                                                                                                                           |   |          |   |               |   |             |   |                      |   |               |   |       |
| 2  | Family Member                                                                                            |                                                                   |                                                                                                                                                                                                                                                                           |   |          |   |               |   |             |   |                      |   |               |   |       |
| 3  | Family unit                                                                                              |                                                                   |                                                                                                                                                                                                                                                                           |   |          |   |               |   |             |   |                      |   |               |   |       |
| 4  | CAC Staff/MDT Member                                                                                     |                                                                   |                                                                                                                                                                                                                                                                           |   |          |   |               |   |             |   |                      |   |               |   |       |
| 5  | Other                                                                                                    |                                                                   |                                                                                                                                                                                                                                                                           |   |          |   |               |   |             |   |                      |   |               |   |       |
| 92 | outcome_type7<br>Show the field ONLY if:<br>[exclude] = '0' and [outcome7] <> "                          | Type of outcome:                                                  | radio<br><table border="1"> <tr><td>1</td><td>Economic</td></tr> <tr><td>2</td><td>Academic</td></tr> <tr><td>3</td><td>Policy</td></tr> <tr><td>4</td><td>Physical Health</td></tr> <tr><td>5</td><td>Mental Health</td></tr> <tr><td>6</td><td>Other</td></tr> </table> | 1 | Economic | 2 | Academic      | 3 | Policy      | 4 | Physical Health      | 5 | Mental Health | 6 | Other |
| 1  | Economic                                                                                                 |                                                                   |                                                                                                                                                                                                                                                                           |   |          |   |               |   |             |   |                      |   |               |   |       |
| 2  | Academic                                                                                                 |                                                                   |                                                                                                                                                                                                                                                                           |   |          |   |               |   |             |   |                      |   |               |   |       |
| 3  | Policy                                                                                                   |                                                                   |                                                                                                                                                                                                                                                                           |   |          |   |               |   |             |   |                      |   |               |   |       |
| 4  | Physical Health                                                                                          |                                                                   |                                                                                                                                                                                                                                                                           |   |          |   |               |   |             |   |                      |   |               |   |       |
| 5  | Mental Health                                                                                            |                                                                   |                                                                                                                                                                                                                                                                           |   |          |   |               |   |             |   |                      |   |               |   |       |
| 6  | Other                                                                                                    |                                                                   |                                                                                                                                                                                                                                                                           |   |          |   |               |   |             |   |                      |   |               |   |       |
| 93 | outcome_other7<br>Show the field ONLY if:<br>[outcome_type7]='6' and [exclude]='0'                       | Other:                                                            | text                                                                                                                                                                                                                                                                      |   |          |   |               |   |             |   |                      |   |               |   |       |
| 94 | outcome8<br>Show the field ONLY if:<br>[outcomes_yn]='1' and [exclude] = '0' and [outcome7] <> "         | Outcome 8:                                                        | notes                                                                                                                                                                                                                                                                     |   |          |   |               |   |             |   |                      |   |               |   |       |
| 95 | operational_def8<br>Show the field ONLY if:<br>[outcomes_yn]='1' and [exclude] = '0' and [outcome8] <> " | What is the operational definition/ How is this outcome measured? | notes                                                                                                                                                                                                                                                                     |   |          |   |               |   |             |   |                      |   |               |   |       |
| 96 | subject8<br>Show the field ONLY if:<br>[exclude] = '0' and [outcome8] <> "                               | Who is the main subject of this outcome?                          | radio<br><table border="1"> <tr><td>1</td><td>Child</td></tr> <tr><td>2</td><td>Family Member</td></tr> <tr><td>3</td><td>Family unit</td></tr> <tr><td>4</td><td>CAC Staff/MDT Member</td></tr> <tr><td>5</td><td>Other</td></tr> </table>                               | 1 | Child    | 2 | Family Member | 3 | Family unit | 4 | CAC Staff/MDT Member | 5 | Other         |   |       |
| 1  | Child                                                                                                    |                                                                   |                                                                                                                                                                                                                                                                           |   |          |   |               |   |             |   |                      |   |               |   |       |
| 2  | Family Member                                                                                            |                                                                   |                                                                                                                                                                                                                                                                           |   |          |   |               |   |             |   |                      |   |               |   |       |
| 3  | Family unit                                                                                              |                                                                   |                                                                                                                                                                                                                                                                           |   |          |   |               |   |             |   |                      |   |               |   |       |
| 4  | CAC Staff/MDT Member                                                                                     |                                                                   |                                                                                                                                                                                                                                                                           |   |          |   |               |   |             |   |                      |   |               |   |       |
| 5  | Other                                                                                                    |                                                                   |                                                                                                                                                                                                                                                                           |   |          |   |               |   |             |   |                      |   |               |   |       |
| 97 | outcome_type8<br>Show the field ONLY if:<br>[exclude] = '0' and [outcome8] <> "                          | Type of outcome:                                                  | radio<br><table border="1"> <tr><td>1</td><td>Economic</td></tr> <tr><td>2</td><td>Academic</td></tr> <tr><td>3</td><td>Policy</td></tr> <tr><td>4</td><td>Physical Health</td></tr> <tr><td>5</td><td>Mental Health</td></tr> <tr><td>6</td><td>Other</td></tr> </table> | 1 | Economic | 2 | Academic      | 3 | Policy      | 4 | Physical Health      | 5 | Mental Health | 6 | Other |
| 1  | Economic                                                                                                 |                                                                   |                                                                                                                                                                                                                                                                           |   |          |   |               |   |             |   |                      |   |               |   |       |
| 2  | Academic                                                                                                 |                                                                   |                                                                                                                                                                                                                                                                           |   |          |   |               |   |             |   |                      |   |               |   |       |
| 3  | Policy                                                                                                   |                                                                   |                                                                                                                                                                                                                                                                           |   |          |   |               |   |             |   |                      |   |               |   |       |
| 4  | Physical Health                                                                                          |                                                                   |                                                                                                                                                                                                                                                                           |   |          |   |               |   |             |   |                      |   |               |   |       |
| 5  | Mental Health                                                                                            |                                                                   |                                                                                                                                                                                                                                                                           |   |          |   |               |   |             |   |                      |   |               |   |       |
| 6  | Other                                                                                                    |                                                                   |                                                                                                                                                                                                                                                                           |   |          |   |               |   |             |   |                      |   |               |   |       |

|   |                      |                                                                                                              |                                                                   |                                                                                                                                                                                                                                                                           |   |          |   |               |   |             |   |                      |   |               |   |       |
|---|----------------------|--------------------------------------------------------------------------------------------------------------|-------------------------------------------------------------------|---------------------------------------------------------------------------------------------------------------------------------------------------------------------------------------------------------------------------------------------------------------------------|---|----------|---|---------------|---|-------------|---|----------------------|---|---------------|---|-------|
|   | 98                   | outcome_other8<br>Show the field ONLY if:<br>[outcome_type8]='6' and [exclude]='0'                           | Other:                                                            | text                                                                                                                                                                                                                                                                      |   |          |   |               |   |             |   |                      |   |               |   |       |
|   | 99                   | outcome9<br>Show the field ONLY if:<br>[outcomes_yn]='1' and [exclude] = '0' and [outcome8] <> "             | Outcome 9:                                                        | notes                                                                                                                                                                                                                                                                     |   |          |   |               |   |             |   |                      |   |               |   |       |
|   | 100                  | operational_def9<br>Show the field ONLY if:<br>[outcomes_yn]='1' and [exclude] = '0' and [outcome9] <> "     | What is the operational definition/ How is this outcome measured? | notes                                                                                                                                                                                                                                                                     |   |          |   |               |   |             |   |                      |   |               |   |       |
|   | 101                  | subject9<br>Show the field ONLY if:<br>[exclude] = '0' and [outcome9] <> "                                   | Who is the main subject of this outcome?                          | radio<br><table border="1"> <tr><td>1</td><td>Child</td></tr> <tr><td>2</td><td>Family Member</td></tr> <tr><td>3</td><td>Family unit</td></tr> <tr><td>4</td><td>CAC Staff/MDT Member</td></tr> <tr><td>5</td><td>Other</td></tr> </table>                               | 1 | Child    | 2 | Family Member | 3 | Family unit | 4 | CAC Staff/MDT Member | 5 | Other         |   |       |
| 1 | Child                |                                                                                                              |                                                                   |                                                                                                                                                                                                                                                                           |   |          |   |               |   |             |   |                      |   |               |   |       |
| 2 | Family Member        |                                                                                                              |                                                                   |                                                                                                                                                                                                                                                                           |   |          |   |               |   |             |   |                      |   |               |   |       |
| 3 | Family unit          |                                                                                                              |                                                                   |                                                                                                                                                                                                                                                                           |   |          |   |               |   |             |   |                      |   |               |   |       |
| 4 | CAC Staff/MDT Member |                                                                                                              |                                                                   |                                                                                                                                                                                                                                                                           |   |          |   |               |   |             |   |                      |   |               |   |       |
| 5 | Other                |                                                                                                              |                                                                   |                                                                                                                                                                                                                                                                           |   |          |   |               |   |             |   |                      |   |               |   |       |
|   | 102                  | outcome_type9<br>Show the field ONLY if:<br>[exclude] = '0' and [outcome9] <> "                              | Type of outcome:                                                  | radio<br><table border="1"> <tr><td>1</td><td>Economic</td></tr> <tr><td>2</td><td>Academic</td></tr> <tr><td>3</td><td>Policy</td></tr> <tr><td>4</td><td>Physical Health</td></tr> <tr><td>5</td><td>Mental Health</td></tr> <tr><td>6</td><td>Other</td></tr> </table> | 1 | Economic | 2 | Academic      | 3 | Policy      | 4 | Physical Health      | 5 | Mental Health | 6 | Other |
| 1 | Economic             |                                                                                                              |                                                                   |                                                                                                                                                                                                                                                                           |   |          |   |               |   |             |   |                      |   |               |   |       |
| 2 | Academic             |                                                                                                              |                                                                   |                                                                                                                                                                                                                                                                           |   |          |   |               |   |             |   |                      |   |               |   |       |
| 3 | Policy               |                                                                                                              |                                                                   |                                                                                                                                                                                                                                                                           |   |          |   |               |   |             |   |                      |   |               |   |       |
| 4 | Physical Health      |                                                                                                              |                                                                   |                                                                                                                                                                                                                                                                           |   |          |   |               |   |             |   |                      |   |               |   |       |
| 5 | Mental Health        |                                                                                                              |                                                                   |                                                                                                                                                                                                                                                                           |   |          |   |               |   |             |   |                      |   |               |   |       |
| 6 | Other                |                                                                                                              |                                                                   |                                                                                                                                                                                                                                                                           |   |          |   |               |   |             |   |                      |   |               |   |       |
|   | 103                  | outcome_other9<br>Show the field ONLY if:<br>[outcome_type9]='6' and [exclude]='0'                           | Other:                                                            | text                                                                                                                                                                                                                                                                      |   |          |   |               |   |             |   |                      |   |               |   |       |
|   | 104                  | outcome10<br>Show the field ONLY if:<br>[outcomes_yn]='1' and [exclude] = '0' and [outcome9] <> "            | Outcome 10:                                                       | notes                                                                                                                                                                                                                                                                     |   |          |   |               |   |             |   |                      |   |               |   |       |
|   | 105                  | operational_def10<br>Show the field ONLY if:<br>[outcomes_yn]='1' and [exclude] = '0' and [outcome10] <> ' , | What is the operational definition/ How is this outcome measured? | notes                                                                                                                                                                                                                                                                     |   |          |   |               |   |             |   |                      |   |               |   |       |
|   | 106                  | subject10<br>Show the field ONLY if:<br>[exclude] = '0' and [outcome10] <> "                                 | Who is the main subject of this outcome?                          | radio<br><table border="1"> <tr><td>1</td><td>Child</td></tr> <tr><td>2</td><td>Family Member</td></tr> <tr><td>3</td><td>Family unit</td></tr> <tr><td>4</td><td>CAC Staff/MDT Member</td></tr> <tr><td>5</td><td>Other</td></tr> </table>                               | 1 | Child    | 2 | Family Member | 3 | Family unit | 4 | CAC Staff/MDT Member | 5 | Other         |   |       |
| 1 | Child                |                                                                                                              |                                                                   |                                                                                                                                                                                                                                                                           |   |          |   |               |   |             |   |                      |   |               |   |       |
| 2 | Family Member        |                                                                                                              |                                                                   |                                                                                                                                                                                                                                                                           |   |          |   |               |   |             |   |                      |   |               |   |       |
| 3 | Family unit          |                                                                                                              |                                                                   |                                                                                                                                                                                                                                                                           |   |          |   |               |   |             |   |                      |   |               |   |       |
| 4 | CAC Staff/MDT Member |                                                                                                              |                                                                   |                                                                                                                                                                                                                                                                           |   |          |   |               |   |             |   |                      |   |               |   |       |
| 5 | Other                |                                                                                                              |                                                                   |                                                                                                                                                                                                                                                                           |   |          |   |               |   |             |   |                      |   |               |   |       |
|   | 107                  | outcome_type10<br>Show the field ONLY if:<br>[exclude] = '0' and [outcome10] <> "                            | Type of outcome:                                                  | radio<br><table border="1"> <tr><td>1</td><td>Economic</td></tr> <tr><td>2</td><td>Academic</td></tr> <tr><td>3</td><td>Policy</td></tr> <tr><td>4</td><td>Physical Health</td></tr> <tr><td>5</td><td>Mental Health</td></tr> <tr><td>6</td><td>Other</td></tr> </table> | 1 | Economic | 2 | Academic      | 3 | Policy      | 4 | Physical Health      | 5 | Mental Health | 6 | Other |
| 1 | Economic             |                                                                                                              |                                                                   |                                                                                                                                                                                                                                                                           |   |          |   |               |   |             |   |                      |   |               |   |       |
| 2 | Academic             |                                                                                                              |                                                                   |                                                                                                                                                                                                                                                                           |   |          |   |               |   |             |   |                      |   |               |   |       |
| 3 | Policy               |                                                                                                              |                                                                   |                                                                                                                                                                                                                                                                           |   |          |   |               |   |             |   |                      |   |               |   |       |
| 4 | Physical Health      |                                                                                                              |                                                                   |                                                                                                                                                                                                                                                                           |   |          |   |               |   |             |   |                      |   |               |   |       |
| 5 | Mental Health        |                                                                                                              |                                                                   |                                                                                                                                                                                                                                                                           |   |          |   |               |   |             |   |                      |   |               |   |       |
| 6 | Other                |                                                                                                              |                                                                   |                                                                                                                                                                                                                                                                           |   |          |   |               |   |             |   |                      |   |               |   |       |

|     |                                                                                                     |                                                                                                     |                                                                                                                                                                                                                                                                                                                                                                                                                                                                                                         |   |              |   |                  |   |                 |   |             |   |                    |   |                 |   |                             |   |                  |   |                        |    |       |
|-----|-----------------------------------------------------------------------------------------------------|-----------------------------------------------------------------------------------------------------|---------------------------------------------------------------------------------------------------------------------------------------------------------------------------------------------------------------------------------------------------------------------------------------------------------------------------------------------------------------------------------------------------------------------------------------------------------------------------------------------------------|---|--------------|---|------------------|---|-----------------|---|-------------|---|--------------------|---|-----------------|---|-----------------------------|---|------------------|---|------------------------|----|-------|
| 108 | outcome_other10<br>Show the field ONLY if:<br>[outcome_type10]='6' and [exclude]='0'                | Other:                                                                                              | text                                                                                                                                                                                                                                                                                                                                                                                                                                                                                                    |   |              |   |                  |   |                 |   |             |   |                    |   |                 |   |                             |   |                  |   |                        |    |       |
| 109 | outcomes_imple_science<br>Show the field ONLY if:<br>[impl_science]='1' and [exclude] = '0'         | Outcomes:                                                                                           | notes                                                                                                                                                                                                                                                                                                                                                                                                                                                                                                   |   |              |   |                  |   |                 |   |             |   |                    |   |                 |   |                             |   |                  |   |                        |    |       |
| 110 | tot_outcomes<br>Show the field ONLY if:<br>[exclude] = '0'                                          | How many total outcomes were addressed in this paper?                                               | dropdown<br><table border="1"> <tr><td>1</td><td>1</td></tr> <tr><td>2</td><td>2</td></tr> <tr><td>3</td><td>3</td></tr> <tr><td>4</td><td>4</td></tr> <tr><td>5</td><td>5</td></tr> <tr><td>6</td><td>6</td></tr> <tr><td>7</td><td>7</td></tr> <tr><td>8</td><td>8</td></tr> <tr><td>9</td><td>9</td></tr> <tr><td>10</td><td>10</td></tr> </table>                                                                                                                                                   | 1 | 1            | 2 | 2                | 3 | 3               | 4 | 4           | 5 | 5                  | 6 | 6               | 7 | 7                           | 8 | 8                | 9 | 9                      | 10 | 10    |
| 1   | 1                                                                                                   |                                                                                                     |                                                                                                                                                                                                                                                                                                                                                                                                                                                                                                         |   |              |   |                  |   |                 |   |             |   |                    |   |                 |   |                             |   |                  |   |                        |    |       |
| 2   | 2                                                                                                   |                                                                                                     |                                                                                                                                                                                                                                                                                                                                                                                                                                                                                                         |   |              |   |                  |   |                 |   |             |   |                    |   |                 |   |                             |   |                  |   |                        |    |       |
| 3   | 3                                                                                                   |                                                                                                     |                                                                                                                                                                                                                                                                                                                                                                                                                                                                                                         |   |              |   |                  |   |                 |   |             |   |                    |   |                 |   |                             |   |                  |   |                        |    |       |
| 4   | 4                                                                                                   |                                                                                                     |                                                                                                                                                                                                                                                                                                                                                                                                                                                                                                         |   |              |   |                  |   |                 |   |             |   |                    |   |                 |   |                             |   |                  |   |                        |    |       |
| 5   | 5                                                                                                   |                                                                                                     |                                                                                                                                                                                                                                                                                                                                                                                                                                                                                                         |   |              |   |                  |   |                 |   |             |   |                    |   |                 |   |                             |   |                  |   |                        |    |       |
| 6   | 6                                                                                                   |                                                                                                     |                                                                                                                                                                                                                                                                                                                                                                                                                                                                                                         |   |              |   |                  |   |                 |   |             |   |                    |   |                 |   |                             |   |                  |   |                        |    |       |
| 7   | 7                                                                                                   |                                                                                                     |                                                                                                                                                                                                                                                                                                                                                                                                                                                                                                         |   |              |   |                  |   |                 |   |             |   |                    |   |                 |   |                             |   |                  |   |                        |    |       |
| 8   | 8                                                                                                   |                                                                                                     |                                                                                                                                                                                                                                                                                                                                                                                                                                                                                                         |   |              |   |                  |   |                 |   |             |   |                    |   |                 |   |                             |   |                  |   |                        |    |       |
| 9   | 9                                                                                                   |                                                                                                     |                                                                                                                                                                                                                                                                                                                                                                                                                                                                                                         |   |              |   |                  |   |                 |   |             |   |                    |   |                 |   |                             |   |                  |   |                        |    |       |
| 10  | 10                                                                                                  |                                                                                                     |                                                                                                                                                                                                                                                                                                                                                                                                                                                                                                         |   |              |   |                  |   |                 |   |             |   |                    |   |                 |   |                             |   |                  |   |                        |    |       |
| 111 | outputs_yn<br>Show the field ONLY if:<br>[exclude] = '0'                                            | Section Header: <i>OUTPUTS (Directly related to the program)</i><br>Does the paper address outputs? | yesno<br><table border="1"> <tr><td>1</td><td>Yes</td></tr> <tr><td>0</td><td>No</td></tr> </table>                                                                                                                                                                                                                                                                                                                                                                                                     | 1 | Yes          | 0 | No               |   |                 |   |             |   |                    |   |                 |   |                             |   |                  |   |                        |    |       |
| 1   | Yes                                                                                                 |                                                                                                     |                                                                                                                                                                                                                                                                                                                                                                                                                                                                                                         |   |              |   |                  |   |                 |   |             |   |                    |   |                 |   |                             |   |                  |   |                        |    |       |
| 0   | No                                                                                                  |                                                                                                     |                                                                                                                                                                                                                                                                                                                                                                                                                                                                                                         |   |              |   |                  |   |                 |   |             |   |                    |   |                 |   |                             |   |                  |   |                        |    |       |
| 112 | output<br>Show the field ONLY if:<br>[outputs_yn]='1' and [exclude] = '0'                           | Outputs 1:                                                                                          | notes                                                                                                                                                                                                                                                                                                                                                                                                                                                                                                   |   |              |   |                  |   |                 |   |             |   |                    |   |                 |   |                             |   |                  |   |                        |    |       |
| 113 | op_def_output<br>Show the field ONLY if:<br>[outputs_yn]='1' and [exclude] = '0' and [output] <> "  | What is the operational definition/ How is this output measured?                                    | notes                                                                                                                                                                                                                                                                                                                                                                                                                                                                                                   |   |              |   |                  |   |                 |   |             |   |                    |   |                 |   |                             |   |                  |   |                        |    |       |
| 114 | output_address<br>Show the field ONLY if:<br>[exclude] = '0' and [output] <> "                      | What service/program component does this output address?                                            | dropdown<br><table border="1"> <tr><td>1</td><td>Satisfaction</td></tr> <tr><td>2</td><td>Economic outputs</td></tr> <tr><td>3</td><td>Law enforcement</td></tr> <tr><td>4</td><td>Prosecution</td></tr> <tr><td>5</td><td>Forensic interview</td></tr> <tr><td>6</td><td>CPS/Social Work</td></tr> <tr><td>7</td><td>Victim and Family Advocates</td></tr> <tr><td>8</td><td>Medical services</td></tr> <tr><td>9</td><td>Mental health services</td></tr> <tr><td>10</td><td>Other</td></tr> </table> | 1 | Satisfaction | 2 | Economic outputs | 3 | Law enforcement | 4 | Prosecution | 5 | Forensic interview | 6 | CPS/Social Work | 7 | Victim and Family Advocates | 8 | Medical services | 9 | Mental health services | 10 | Other |
| 1   | Satisfaction                                                                                        |                                                                                                     |                                                                                                                                                                                                                                                                                                                                                                                                                                                                                                         |   |              |   |                  |   |                 |   |             |   |                    |   |                 |   |                             |   |                  |   |                        |    |       |
| 2   | Economic outputs                                                                                    |                                                                                                     |                                                                                                                                                                                                                                                                                                                                                                                                                                                                                                         |   |              |   |                  |   |                 |   |             |   |                    |   |                 |   |                             |   |                  |   |                        |    |       |
| 3   | Law enforcement                                                                                     |                                                                                                     |                                                                                                                                                                                                                                                                                                                                                                                                                                                                                                         |   |              |   |                  |   |                 |   |             |   |                    |   |                 |   |                             |   |                  |   |                        |    |       |
| 4   | Prosecution                                                                                         |                                                                                                     |                                                                                                                                                                                                                                                                                                                                                                                                                                                                                                         |   |              |   |                  |   |                 |   |             |   |                    |   |                 |   |                             |   |                  |   |                        |    |       |
| 5   | Forensic interview                                                                                  |                                                                                                     |                                                                                                                                                                                                                                                                                                                                                                                                                                                                                                         |   |              |   |                  |   |                 |   |             |   |                    |   |                 |   |                             |   |                  |   |                        |    |       |
| 6   | CPS/Social Work                                                                                     |                                                                                                     |                                                                                                                                                                                                                                                                                                                                                                                                                                                                                                         |   |              |   |                  |   |                 |   |             |   |                    |   |                 |   |                             |   |                  |   |                        |    |       |
| 7   | Victim and Family Advocates                                                                         |                                                                                                     |                                                                                                                                                                                                                                                                                                                                                                                                                                                                                                         |   |              |   |                  |   |                 |   |             |   |                    |   |                 |   |                             |   |                  |   |                        |    |       |
| 8   | Medical services                                                                                    |                                                                                                     |                                                                                                                                                                                                                                                                                                                                                                                                                                                                                                         |   |              |   |                  |   |                 |   |             |   |                    |   |                 |   |                             |   |                  |   |                        |    |       |
| 9   | Mental health services                                                                              |                                                                                                     |                                                                                                                                                                                                                                                                                                                                                                                                                                                                                                         |   |              |   |                  |   |                 |   |             |   |                    |   |                 |   |                             |   |                  |   |                        |    |       |
| 10  | Other                                                                                               |                                                                                                     |                                                                                                                                                                                                                                                                                                                                                                                                                                                                                                         |   |              |   |                  |   |                 |   |             |   |                    |   |                 |   |                             |   |                  |   |                        |    |       |
| 115 | output_address_other<br>Show the field ONLY if:<br>[exclude] = '0' and [output_address]='10'        | Other:                                                                                              | text                                                                                                                                                                                                                                                                                                                                                                                                                                                                                                    |   |              |   |                  |   |                 |   |             |   |                    |   |                 |   |                             |   |                  |   |                        |    |       |
| 116 | satis_type<br>Show the field ONLY if:<br>[output_address] = '1' and [exclude]='0' and [output] <> " | Satisfaction type:                                                                                  | radio<br><table border="1"> <tr><td>1</td><td>Caregiver</td></tr> <tr><td>2</td><td>Patient</td></tr> <tr><td>3</td><td>MDT staff</td></tr> </table>                                                                                                                                                                                                                                                                                                                                                    | 1 | Caregiver    | 2 | Patient          | 3 | MDT staff       |   |             |   |                    |   |                 |   |                             |   |                  |   |                        |    |       |
| 1   | Caregiver                                                                                           |                                                                                                     |                                                                                                                                                                                                                                                                                                                                                                                                                                                                                                         |   |              |   |                  |   |                 |   |             |   |                    |   |                 |   |                             |   |                  |   |                        |    |       |
| 2   | Patient                                                                                             |                                                                                                     |                                                                                                                                                                                                                                                                                                                                                                                                                                                                                                         |   |              |   |                  |   |                 |   |             |   |                    |   |                 |   |                             |   |                  |   |                        |    |       |
| 3   | MDT staff                                                                                           |                                                                                                     |                                                                                                                                                                                                                                                                                                                                                                                                                                                                                                         |   |              |   |                  |   |                 |   |             |   |                    |   |                 |   |                             |   |                  |   |                        |    |       |

|    |                             |                                                                                                        |                                                                  |                                                                                                                                                                                                                                                                                                                                                                                                                                                                                                         |   |              |   |                  |   |                 |   |             |   |                    |   |                 |   |                             |   |                  |   |                        |    |       |
|----|-----------------------------|--------------------------------------------------------------------------------------------------------|------------------------------------------------------------------|---------------------------------------------------------------------------------------------------------------------------------------------------------------------------------------------------------------------------------------------------------------------------------------------------------------------------------------------------------------------------------------------------------------------------------------------------------------------------------------------------------|---|--------------|---|------------------|---|-----------------|---|-------------|---|--------------------|---|-----------------|---|-----------------------------|---|------------------|---|------------------------|----|-------|
|    | 117                         | output2<br>Show the field ONLY if:<br>[outputs_yn]='1' and [exclude]= '0' and [output] <> "            | Output 2:                                                        | notes                                                                                                                                                                                                                                                                                                                                                                                                                                                                                                   |   |              |   |                  |   |                 |   |             |   |                    |   |                 |   |                             |   |                  |   |                        |    |       |
|    | 118                         | op_def_output2<br>Show the field ONLY if:<br>[outputs_yn]='1' and [exclude]= '0' and [output2] <> "    | What is the operational definition/ How is this output measured? | notes                                                                                                                                                                                                                                                                                                                                                                                                                                                                                                   |   |              |   |                  |   |                 |   |             |   |                    |   |                 |   |                             |   |                  |   |                        |    |       |
|    | 119                         | output_address_2<br>Show the field ONLY if:<br>[exclude] = '0' and [output2] <> "                      | What service/program component does this output address?         | dropdown<br><table border="1"> <tr><td>1</td><td>Satisfaction</td></tr> <tr><td>2</td><td>Economic outputs</td></tr> <tr><td>3</td><td>Law enforcement</td></tr> <tr><td>4</td><td>Prosecution</td></tr> <tr><td>5</td><td>Forensic interview</td></tr> <tr><td>6</td><td>CPS/Social Work</td></tr> <tr><td>7</td><td>Victim and Family Advocates</td></tr> <tr><td>8</td><td>Medical services</td></tr> <tr><td>9</td><td>Mental health services</td></tr> <tr><td>10</td><td>Other</td></tr> </table> | 1 | Satisfaction | 2 | Economic outputs | 3 | Law enforcement | 4 | Prosecution | 5 | Forensic interview | 6 | CPS/Social Work | 7 | Victim and Family Advocates | 8 | Medical services | 9 | Mental health services | 10 | Other |
| 1  | Satisfaction                |                                                                                                        |                                                                  |                                                                                                                                                                                                                                                                                                                                                                                                                                                                                                         |   |              |   |                  |   |                 |   |             |   |                    |   |                 |   |                             |   |                  |   |                        |    |       |
| 2  | Economic outputs            |                                                                                                        |                                                                  |                                                                                                                                                                                                                                                                                                                                                                                                                                                                                                         |   |              |   |                  |   |                 |   |             |   |                    |   |                 |   |                             |   |                  |   |                        |    |       |
| 3  | Law enforcement             |                                                                                                        |                                                                  |                                                                                                                                                                                                                                                                                                                                                                                                                                                                                                         |   |              |   |                  |   |                 |   |             |   |                    |   |                 |   |                             |   |                  |   |                        |    |       |
| 4  | Prosecution                 |                                                                                                        |                                                                  |                                                                                                                                                                                                                                                                                                                                                                                                                                                                                                         |   |              |   |                  |   |                 |   |             |   |                    |   |                 |   |                             |   |                  |   |                        |    |       |
| 5  | Forensic interview          |                                                                                                        |                                                                  |                                                                                                                                                                                                                                                                                                                                                                                                                                                                                                         |   |              |   |                  |   |                 |   |             |   |                    |   |                 |   |                             |   |                  |   |                        |    |       |
| 6  | CPS/Social Work             |                                                                                                        |                                                                  |                                                                                                                                                                                                                                                                                                                                                                                                                                                                                                         |   |              |   |                  |   |                 |   |             |   |                    |   |                 |   |                             |   |                  |   |                        |    |       |
| 7  | Victim and Family Advocates |                                                                                                        |                                                                  |                                                                                                                                                                                                                                                                                                                                                                                                                                                                                                         |   |              |   |                  |   |                 |   |             |   |                    |   |                 |   |                             |   |                  |   |                        |    |       |
| 8  | Medical services            |                                                                                                        |                                                                  |                                                                                                                                                                                                                                                                                                                                                                                                                                                                                                         |   |              |   |                  |   |                 |   |             |   |                    |   |                 |   |                             |   |                  |   |                        |    |       |
| 9  | Mental health services      |                                                                                                        |                                                                  |                                                                                                                                                                                                                                                                                                                                                                                                                                                                                                         |   |              |   |                  |   |                 |   |             |   |                    |   |                 |   |                             |   |                  |   |                        |    |       |
| 10 | Other                       |                                                                                                        |                                                                  |                                                                                                                                                                                                                                                                                                                                                                                                                                                                                                         |   |              |   |                  |   |                 |   |             |   |                    |   |                 |   |                             |   |                  |   |                        |    |       |
|    | 120                         | output_address_other_2<br>Show the field ONLY if:<br>[exclude] = '0' and [output_address_2]='10'       | Other:                                                           | text                                                                                                                                                                                                                                                                                                                                                                                                                                                                                                    |   |              |   |                  |   |                 |   |             |   |                    |   |                 |   |                             |   |                  |   |                        |    |       |
|    | 121                         | satis_type_2<br>Show the field ONLY if:<br>[output_address] = '1' and [exclude]='0' and [output2] <> " | Satisfaction type:                                               | radio<br><table border="1"> <tr><td>1</td><td>Caregiver</td></tr> <tr><td>2</td><td>Patient</td></tr> <tr><td>3</td><td>MDT staff</td></tr> </table>                                                                                                                                                                                                                                                                                                                                                    | 1 | Caregiver    | 2 | Patient          | 3 | MDT staff       |   |             |   |                    |   |                 |   |                             |   |                  |   |                        |    |       |
| 1  | Caregiver                   |                                                                                                        |                                                                  |                                                                                                                                                                                                                                                                                                                                                                                                                                                                                                         |   |              |   |                  |   |                 |   |             |   |                    |   |                 |   |                             |   |                  |   |                        |    |       |
| 2  | Patient                     |                                                                                                        |                                                                  |                                                                                                                                                                                                                                                                                                                                                                                                                                                                                                         |   |              |   |                  |   |                 |   |             |   |                    |   |                 |   |                             |   |                  |   |                        |    |       |
| 3  | MDT staff                   |                                                                                                        |                                                                  |                                                                                                                                                                                                                                                                                                                                                                                                                                                                                                         |   |              |   |                  |   |                 |   |             |   |                    |   |                 |   |                             |   |                  |   |                        |    |       |
|    | 122                         | output3<br>Show the field ONLY if:<br>[outputs_yn]='1' and [exclude]= '0' and [output2] <> "           | Output 3:                                                        | notes                                                                                                                                                                                                                                                                                                                                                                                                                                                                                                   |   |              |   |                  |   |                 |   |             |   |                    |   |                 |   |                             |   |                  |   |                        |    |       |
|    | 123                         | op_def_output3<br>Show the field ONLY if:<br>[outputs_yn]='1' and [exclude]= '0' and [output3] <> "    | What is the operational definition/ How is this output measured? | notes                                                                                                                                                                                                                                                                                                                                                                                                                                                                                                   |   |              |   |                  |   |                 |   |             |   |                    |   |                 |   |                             |   |                  |   |                        |    |       |
|    | 124                         | output_address_3<br>Show the field ONLY if:<br>[exclude] = '0' and [output3] <> "                      | What service/program component does this output address?         | dropdown<br><table border="1"> <tr><td>1</td><td>Satisfaction</td></tr> <tr><td>2</td><td>Economic outputs</td></tr> <tr><td>3</td><td>Law enforcement</td></tr> <tr><td>4</td><td>Prosecution</td></tr> <tr><td>5</td><td>Forensic interview</td></tr> <tr><td>6</td><td>CPS/Social Work</td></tr> <tr><td>7</td><td>Victim and Family Advocates</td></tr> <tr><td>8</td><td>Medical services</td></tr> <tr><td>9</td><td>Mental health services</td></tr> <tr><td>10</td><td>Other</td></tr> </table> | 1 | Satisfaction | 2 | Economic outputs | 3 | Law enforcement | 4 | Prosecution | 5 | Forensic interview | 6 | CPS/Social Work | 7 | Victim and Family Advocates | 8 | Medical services | 9 | Mental health services | 10 | Other |
| 1  | Satisfaction                |                                                                                                        |                                                                  |                                                                                                                                                                                                                                                                                                                                                                                                                                                                                                         |   |              |   |                  |   |                 |   |             |   |                    |   |                 |   |                             |   |                  |   |                        |    |       |
| 2  | Economic outputs            |                                                                                                        |                                                                  |                                                                                                                                                                                                                                                                                                                                                                                                                                                                                                         |   |              |   |                  |   |                 |   |             |   |                    |   |                 |   |                             |   |                  |   |                        |    |       |
| 3  | Law enforcement             |                                                                                                        |                                                                  |                                                                                                                                                                                                                                                                                                                                                                                                                                                                                                         |   |              |   |                  |   |                 |   |             |   |                    |   |                 |   |                             |   |                  |   |                        |    |       |
| 4  | Prosecution                 |                                                                                                        |                                                                  |                                                                                                                                                                                                                                                                                                                                                                                                                                                                                                         |   |              |   |                  |   |                 |   |             |   |                    |   |                 |   |                             |   |                  |   |                        |    |       |
| 5  | Forensic interview          |                                                                                                        |                                                                  |                                                                                                                                                                                                                                                                                                                                                                                                                                                                                                         |   |              |   |                  |   |                 |   |             |   |                    |   |                 |   |                             |   |                  |   |                        |    |       |
| 6  | CPS/Social Work             |                                                                                                        |                                                                  |                                                                                                                                                                                                                                                                                                                                                                                                                                                                                                         |   |              |   |                  |   |                 |   |             |   |                    |   |                 |   |                             |   |                  |   |                        |    |       |
| 7  | Victim and Family Advocates |                                                                                                        |                                                                  |                                                                                                                                                                                                                                                                                                                                                                                                                                                                                                         |   |              |   |                  |   |                 |   |             |   |                    |   |                 |   |                             |   |                  |   |                        |    |       |
| 8  | Medical services            |                                                                                                        |                                                                  |                                                                                                                                                                                                                                                                                                                                                                                                                                                                                                         |   |              |   |                  |   |                 |   |             |   |                    |   |                 |   |                             |   |                  |   |                        |    |       |
| 9  | Mental health services      |                                                                                                        |                                                                  |                                                                                                                                                                                                                                                                                                                                                                                                                                                                                                         |   |              |   |                  |   |                 |   |             |   |                    |   |                 |   |                             |   |                  |   |                        |    |       |
| 10 | Other                       |                                                                                                        |                                                                  |                                                                                                                                                                                                                                                                                                                                                                                                                                                                                                         |   |              |   |                  |   |                 |   |             |   |                    |   |                 |   |                             |   |                  |   |                        |    |       |
|    | 125                         | output_address_other_3<br>Show the field ONLY if:<br>[exclude] = '0' and [output_address_3]='10'       | Other:                                                           | text                                                                                                                                                                                                                                                                                                                                                                                                                                                                                                    |   |              |   |                  |   |                 |   |             |   |                    |   |                 |   |                             |   |                  |   |                        |    |       |

|     |                                                                                                        |                                                                  |                                                                                                                                                                                                                                                                                                                                                                                                                                                                                                         |   |              |   |                  |   |                 |   |             |   |                    |   |                 |   |                             |   |                  |   |                        |    |       |
|-----|--------------------------------------------------------------------------------------------------------|------------------------------------------------------------------|---------------------------------------------------------------------------------------------------------------------------------------------------------------------------------------------------------------------------------------------------------------------------------------------------------------------------------------------------------------------------------------------------------------------------------------------------------------------------------------------------------|---|--------------|---|------------------|---|-----------------|---|-------------|---|--------------------|---|-----------------|---|-----------------------------|---|------------------|---|------------------------|----|-------|
| 126 | satis_type_3<br>Show the field ONLY if:<br>[output_address] = '1' and [exclude]='0' and [output3] <> " | Satisfaction type:                                               | radio<br><table border="1"> <tr><td>1</td><td>Caregiver</td></tr> <tr><td>2</td><td>Patient</td></tr> <tr><td>3</td><td>MDT staff</td></tr> </table>                                                                                                                                                                                                                                                                                                                                                    | 1 | Caregiver    | 2 | Patient          | 3 | MDT staff       |   |             |   |                    |   |                 |   |                             |   |                  |   |                        |    |       |
| 1   | Caregiver                                                                                              |                                                                  |                                                                                                                                                                                                                                                                                                                                                                                                                                                                                                         |   |              |   |                  |   |                 |   |             |   |                    |   |                 |   |                             |   |                  |   |                        |    |       |
| 2   | Patient                                                                                                |                                                                  |                                                                                                                                                                                                                                                                                                                                                                                                                                                                                                         |   |              |   |                  |   |                 |   |             |   |                    |   |                 |   |                             |   |                  |   |                        |    |       |
| 3   | MDT staff                                                                                              |                                                                  |                                                                                                                                                                                                                                                                                                                                                                                                                                                                                                         |   |              |   |                  |   |                 |   |             |   |                    |   |                 |   |                             |   |                  |   |                        |    |       |
| 127 | output4<br>Show the field ONLY if:<br>[outputs_yn]='1' and [exclude] = '0' and [output3] <> "          | Output 4:                                                        | notes                                                                                                                                                                                                                                                                                                                                                                                                                                                                                                   |   |              |   |                  |   |                 |   |             |   |                    |   |                 |   |                             |   |                  |   |                        |    |       |
| 128 | op_def_output4<br>Show the field ONLY if:<br>[outputs_yn]='1' and [exclude] = '0' and [output4] <> "   | What is the operational definition/ How is this output measured? | notes                                                                                                                                                                                                                                                                                                                                                                                                                                                                                                   |   |              |   |                  |   |                 |   |             |   |                    |   |                 |   |                             |   |                  |   |                        |    |       |
| 129 | output_address_4<br>Show the field ONLY if:<br>[exclude] = '0' and [output4] <> "                      | What service/program component does this output address?         | dropdown<br><table border="1"> <tr><td>1</td><td>Satisfaction</td></tr> <tr><td>2</td><td>Economic outputs</td></tr> <tr><td>3</td><td>Law enforcement</td></tr> <tr><td>4</td><td>Prosecution</td></tr> <tr><td>5</td><td>Forensic interview</td></tr> <tr><td>6</td><td>CPS/Social Work</td></tr> <tr><td>7</td><td>Victim and Family Advocates</td></tr> <tr><td>8</td><td>Medical services</td></tr> <tr><td>9</td><td>Mental health services</td></tr> <tr><td>10</td><td>Other</td></tr> </table> | 1 | Satisfaction | 2 | Economic outputs | 3 | Law enforcement | 4 | Prosecution | 5 | Forensic interview | 6 | CPS/Social Work | 7 | Victim and Family Advocates | 8 | Medical services | 9 | Mental health services | 10 | Other |
| 1   | Satisfaction                                                                                           |                                                                  |                                                                                                                                                                                                                                                                                                                                                                                                                                                                                                         |   |              |   |                  |   |                 |   |             |   |                    |   |                 |   |                             |   |                  |   |                        |    |       |
| 2   | Economic outputs                                                                                       |                                                                  |                                                                                                                                                                                                                                                                                                                                                                                                                                                                                                         |   |              |   |                  |   |                 |   |             |   |                    |   |                 |   |                             |   |                  |   |                        |    |       |
| 3   | Law enforcement                                                                                        |                                                                  |                                                                                                                                                                                                                                                                                                                                                                                                                                                                                                         |   |              |   |                  |   |                 |   |             |   |                    |   |                 |   |                             |   |                  |   |                        |    |       |
| 4   | Prosecution                                                                                            |                                                                  |                                                                                                                                                                                                                                                                                                                                                                                                                                                                                                         |   |              |   |                  |   |                 |   |             |   |                    |   |                 |   |                             |   |                  |   |                        |    |       |
| 5   | Forensic interview                                                                                     |                                                                  |                                                                                                                                                                                                                                                                                                                                                                                                                                                                                                         |   |              |   |                  |   |                 |   |             |   |                    |   |                 |   |                             |   |                  |   |                        |    |       |
| 6   | CPS/Social Work                                                                                        |                                                                  |                                                                                                                                                                                                                                                                                                                                                                                                                                                                                                         |   |              |   |                  |   |                 |   |             |   |                    |   |                 |   |                             |   |                  |   |                        |    |       |
| 7   | Victim and Family Advocates                                                                            |                                                                  |                                                                                                                                                                                                                                                                                                                                                                                                                                                                                                         |   |              |   |                  |   |                 |   |             |   |                    |   |                 |   |                             |   |                  |   |                        |    |       |
| 8   | Medical services                                                                                       |                                                                  |                                                                                                                                                                                                                                                                                                                                                                                                                                                                                                         |   |              |   |                  |   |                 |   |             |   |                    |   |                 |   |                             |   |                  |   |                        |    |       |
| 9   | Mental health services                                                                                 |                                                                  |                                                                                                                                                                                                                                                                                                                                                                                                                                                                                                         |   |              |   |                  |   |                 |   |             |   |                    |   |                 |   |                             |   |                  |   |                        |    |       |
| 10  | Other                                                                                                  |                                                                  |                                                                                                                                                                                                                                                                                                                                                                                                                                                                                                         |   |              |   |                  |   |                 |   |             |   |                    |   |                 |   |                             |   |                  |   |                        |    |       |
| 130 | output_address_other_4<br>Show the field ONLY if:<br>[exclude] = '0' and [output_address_4]='10'       | Other:                                                           | text                                                                                                                                                                                                                                                                                                                                                                                                                                                                                                    |   |              |   |                  |   |                 |   |             |   |                    |   |                 |   |                             |   |                  |   |                        |    |       |
| 131 | satis_type_4<br>Show the field ONLY if:<br>[output_address] = '1' and [exclude]='0' and [output4] <> " | Satisfaction type:                                               | radio<br><table border="1"> <tr><td>1</td><td>Caregiver</td></tr> <tr><td>2</td><td>Patient</td></tr> <tr><td>3</td><td>MDT staff</td></tr> </table>                                                                                                                                                                                                                                                                                                                                                    | 1 | Caregiver    | 2 | Patient          | 3 | MDT staff       |   |             |   |                    |   |                 |   |                             |   |                  |   |                        |    |       |
| 1   | Caregiver                                                                                              |                                                                  |                                                                                                                                                                                                                                                                                                                                                                                                                                                                                                         |   |              |   |                  |   |                 |   |             |   |                    |   |                 |   |                             |   |                  |   |                        |    |       |
| 2   | Patient                                                                                                |                                                                  |                                                                                                                                                                                                                                                                                                                                                                                                                                                                                                         |   |              |   |                  |   |                 |   |             |   |                    |   |                 |   |                             |   |                  |   |                        |    |       |
| 3   | MDT staff                                                                                              |                                                                  |                                                                                                                                                                                                                                                                                                                                                                                                                                                                                                         |   |              |   |                  |   |                 |   |             |   |                    |   |                 |   |                             |   |                  |   |                        |    |       |
| 132 | output5<br>Show the field ONLY if:<br>[outputs_yn]='1' and [exclude] = '0' and [output4] <> "          | Output 5:                                                        | notes                                                                                                                                                                                                                                                                                                                                                                                                                                                                                                   |   |              |   |                  |   |                 |   |             |   |                    |   |                 |   |                             |   |                  |   |                        |    |       |
| 133 | op_def_output5<br>Show the field ONLY if:<br>[outputs_yn]='1' and [exclude] = '0' and [output5] <> "   | What is the operational definition/ How is this output measured? | notes                                                                                                                                                                                                                                                                                                                                                                                                                                                                                                   |   |              |   |                  |   |                 |   |             |   |                    |   |                 |   |                             |   |                  |   |                        |    |       |
| 134 | output_address_5<br>Show the field ONLY if:<br>[exclude] = '0' and [output5] <> "                      | What service/program component does this output address?         | dropdown<br><table border="1"> <tr><td>1</td><td>Satisfaction</td></tr> <tr><td>2</td><td>Economic outputs</td></tr> <tr><td>3</td><td>Law enforcement</td></tr> <tr><td>4</td><td>Prosecution</td></tr> <tr><td>5</td><td>Forensic interview</td></tr> <tr><td>6</td><td>CPS/Social Work</td></tr> <tr><td>7</td><td>Victim and Family Advocates</td></tr> <tr><td>8</td><td>Medical services</td></tr> <tr><td>9</td><td>Mental health services</td></tr> <tr><td>10</td><td>Other</td></tr> </table> | 1 | Satisfaction | 2 | Economic outputs | 3 | Law enforcement | 4 | Prosecution | 5 | Forensic interview | 6 | CPS/Social Work | 7 | Victim and Family Advocates | 8 | Medical services | 9 | Mental health services | 10 | Other |
| 1   | Satisfaction                                                                                           |                                                                  |                                                                                                                                                                                                                                                                                                                                                                                                                                                                                                         |   |              |   |                  |   |                 |   |             |   |                    |   |                 |   |                             |   |                  |   |                        |    |       |
| 2   | Economic outputs                                                                                       |                                                                  |                                                                                                                                                                                                                                                                                                                                                                                                                                                                                                         |   |              |   |                  |   |                 |   |             |   |                    |   |                 |   |                             |   |                  |   |                        |    |       |
| 3   | Law enforcement                                                                                        |                                                                  |                                                                                                                                                                                                                                                                                                                                                                                                                                                                                                         |   |              |   |                  |   |                 |   |             |   |                    |   |                 |   |                             |   |                  |   |                        |    |       |
| 4   | Prosecution                                                                                            |                                                                  |                                                                                                                                                                                                                                                                                                                                                                                                                                                                                                         |   |              |   |                  |   |                 |   |             |   |                    |   |                 |   |                             |   |                  |   |                        |    |       |
| 5   | Forensic interview                                                                                     |                                                                  |                                                                                                                                                                                                                                                                                                                                                                                                                                                                                                         |   |              |   |                  |   |                 |   |             |   |                    |   |                 |   |                             |   |                  |   |                        |    |       |
| 6   | CPS/Social Work                                                                                        |                                                                  |                                                                                                                                                                                                                                                                                                                                                                                                                                                                                                         |   |              |   |                  |   |                 |   |             |   |                    |   |                 |   |                             |   |                  |   |                        |    |       |
| 7   | Victim and Family Advocates                                                                            |                                                                  |                                                                                                                                                                                                                                                                                                                                                                                                                                                                                                         |   |              |   |                  |   |                 |   |             |   |                    |   |                 |   |                             |   |                  |   |                        |    |       |
| 8   | Medical services                                                                                       |                                                                  |                                                                                                                                                                                                                                                                                                                                                                                                                                                                                                         |   |              |   |                  |   |                 |   |             |   |                    |   |                 |   |                             |   |                  |   |                        |    |       |
| 9   | Mental health services                                                                                 |                                                                  |                                                                                                                                                                                                                                                                                                                                                                                                                                                                                                         |   |              |   |                  |   |                 |   |             |   |                    |   |                 |   |                             |   |                  |   |                        |    |       |
| 10  | Other                                                                                                  |                                                                  |                                                                                                                                                                                                                                                                                                                                                                                                                                                                                                         |   |              |   |                  |   |                 |   |             |   |                    |   |                 |   |                             |   |                  |   |                        |    |       |

|     |                                                                                                        |                                                                  |                                                                                                                                                                                                                                                                                                                                                                                                                                                                                                         |   |              |   |                  |   |                 |   |             |   |                    |   |                 |   |                             |   |                  |   |                        |    |       |
|-----|--------------------------------------------------------------------------------------------------------|------------------------------------------------------------------|---------------------------------------------------------------------------------------------------------------------------------------------------------------------------------------------------------------------------------------------------------------------------------------------------------------------------------------------------------------------------------------------------------------------------------------------------------------------------------------------------------|---|--------------|---|------------------|---|-----------------|---|-------------|---|--------------------|---|-----------------|---|-----------------------------|---|------------------|---|------------------------|----|-------|
| 135 | output_address_other_5<br>Show the field ONLY if:<br>[exclude] = '0' and [output_address_5]='10'       | Other:                                                           | text                                                                                                                                                                                                                                                                                                                                                                                                                                                                                                    |   |              |   |                  |   |                 |   |             |   |                    |   |                 |   |                             |   |                  |   |                        |    |       |
| 136 | satis_type_5<br>Show the field ONLY if:<br>[output_address] = '1' and [exclude]='0' and [output5] <> " | Satisfaction type:                                               | radio<br><table border="1"> <tr><td>1</td><td>Caregiver</td></tr> <tr><td>2</td><td>Patient</td></tr> <tr><td>3</td><td>MDT staff</td></tr> </table>                                                                                                                                                                                                                                                                                                                                                    | 1 | Caregiver    | 2 | Patient          | 3 | MDT staff       |   |             |   |                    |   |                 |   |                             |   |                  |   |                        |    |       |
| 1   | Caregiver                                                                                              |                                                                  |                                                                                                                                                                                                                                                                                                                                                                                                                                                                                                         |   |              |   |                  |   |                 |   |             |   |                    |   |                 |   |                             |   |                  |   |                        |    |       |
| 2   | Patient                                                                                                |                                                                  |                                                                                                                                                                                                                                                                                                                                                                                                                                                                                                         |   |              |   |                  |   |                 |   |             |   |                    |   |                 |   |                             |   |                  |   |                        |    |       |
| 3   | MDT staff                                                                                              |                                                                  |                                                                                                                                                                                                                                                                                                                                                                                                                                                                                                         |   |              |   |                  |   |                 |   |             |   |                    |   |                 |   |                             |   |                  |   |                        |    |       |
| 137 | output6<br>Show the field ONLY if:<br>[outputs_yn]='1' and [exclude] = '0' and [output5] <> "          | Output 6:                                                        | notes                                                                                                                                                                                                                                                                                                                                                                                                                                                                                                   |   |              |   |                  |   |                 |   |             |   |                    |   |                 |   |                             |   |                  |   |                        |    |       |
| 138 | op_def_output6<br>Show the field ONLY if:<br>[outputs_yn]='1' and [exclude] = '0' and [output6] <> "   | What is the operational definition/ How is this output measured? | notes                                                                                                                                                                                                                                                                                                                                                                                                                                                                                                   |   |              |   |                  |   |                 |   |             |   |                    |   |                 |   |                             |   |                  |   |                        |    |       |
| 139 | output_address_6<br>Show the field ONLY if:<br>[exclude] = '0' and [output6] <> "                      | What service/program component does this output address?         | dropdown<br><table border="1"> <tr><td>1</td><td>Satisfaction</td></tr> <tr><td>2</td><td>Economic outputs</td></tr> <tr><td>3</td><td>Law enforcement</td></tr> <tr><td>4</td><td>Prosecution</td></tr> <tr><td>5</td><td>Forensic interview</td></tr> <tr><td>6</td><td>CPS/Social Work</td></tr> <tr><td>7</td><td>Victim and Family Advocates</td></tr> <tr><td>8</td><td>Medical services</td></tr> <tr><td>9</td><td>Mental health services</td></tr> <tr><td>10</td><td>Other</td></tr> </table> | 1 | Satisfaction | 2 | Economic outputs | 3 | Law enforcement | 4 | Prosecution | 5 | Forensic interview | 6 | CPS/Social Work | 7 | Victim and Family Advocates | 8 | Medical services | 9 | Mental health services | 10 | Other |
| 1   | Satisfaction                                                                                           |                                                                  |                                                                                                                                                                                                                                                                                                                                                                                                                                                                                                         |   |              |   |                  |   |                 |   |             |   |                    |   |                 |   |                             |   |                  |   |                        |    |       |
| 2   | Economic outputs                                                                                       |                                                                  |                                                                                                                                                                                                                                                                                                                                                                                                                                                                                                         |   |              |   |                  |   |                 |   |             |   |                    |   |                 |   |                             |   |                  |   |                        |    |       |
| 3   | Law enforcement                                                                                        |                                                                  |                                                                                                                                                                                                                                                                                                                                                                                                                                                                                                         |   |              |   |                  |   |                 |   |             |   |                    |   |                 |   |                             |   |                  |   |                        |    |       |
| 4   | Prosecution                                                                                            |                                                                  |                                                                                                                                                                                                                                                                                                                                                                                                                                                                                                         |   |              |   |                  |   |                 |   |             |   |                    |   |                 |   |                             |   |                  |   |                        |    |       |
| 5   | Forensic interview                                                                                     |                                                                  |                                                                                                                                                                                                                                                                                                                                                                                                                                                                                                         |   |              |   |                  |   |                 |   |             |   |                    |   |                 |   |                             |   |                  |   |                        |    |       |
| 6   | CPS/Social Work                                                                                        |                                                                  |                                                                                                                                                                                                                                                                                                                                                                                                                                                                                                         |   |              |   |                  |   |                 |   |             |   |                    |   |                 |   |                             |   |                  |   |                        |    |       |
| 7   | Victim and Family Advocates                                                                            |                                                                  |                                                                                                                                                                                                                                                                                                                                                                                                                                                                                                         |   |              |   |                  |   |                 |   |             |   |                    |   |                 |   |                             |   |                  |   |                        |    |       |
| 8   | Medical services                                                                                       |                                                                  |                                                                                                                                                                                                                                                                                                                                                                                                                                                                                                         |   |              |   |                  |   |                 |   |             |   |                    |   |                 |   |                             |   |                  |   |                        |    |       |
| 9   | Mental health services                                                                                 |                                                                  |                                                                                                                                                                                                                                                                                                                                                                                                                                                                                                         |   |              |   |                  |   |                 |   |             |   |                    |   |                 |   |                             |   |                  |   |                        |    |       |
| 10  | Other                                                                                                  |                                                                  |                                                                                                                                                                                                                                                                                                                                                                                                                                                                                                         |   |              |   |                  |   |                 |   |             |   |                    |   |                 |   |                             |   |                  |   |                        |    |       |
| 140 | output_address_other_6<br>Show the field ONLY if:<br>[exclude] = '0' and [output_address_6]='10'       | Other:                                                           | text                                                                                                                                                                                                                                                                                                                                                                                                                                                                                                    |   |              |   |                  |   |                 |   |             |   |                    |   |                 |   |                             |   |                  |   |                        |    |       |
| 141 | satis_type_6<br>Show the field ONLY if:<br>[output_address] = '1' and [exclude]='0' and [output6] <> " | Satisfaction type:                                               | radio<br><table border="1"> <tr><td>1</td><td>Caregiver</td></tr> <tr><td>2</td><td>Patient</td></tr> <tr><td>3</td><td>MDT staff</td></tr> </table>                                                                                                                                                                                                                                                                                                                                                    | 1 | Caregiver    | 2 | Patient          | 3 | MDT staff       |   |             |   |                    |   |                 |   |                             |   |                  |   |                        |    |       |
| 1   | Caregiver                                                                                              |                                                                  |                                                                                                                                                                                                                                                                                                                                                                                                                                                                                                         |   |              |   |                  |   |                 |   |             |   |                    |   |                 |   |                             |   |                  |   |                        |    |       |
| 2   | Patient                                                                                                |                                                                  |                                                                                                                                                                                                                                                                                                                                                                                                                                                                                                         |   |              |   |                  |   |                 |   |             |   |                    |   |                 |   |                             |   |                  |   |                        |    |       |
| 3   | MDT staff                                                                                              |                                                                  |                                                                                                                                                                                                                                                                                                                                                                                                                                                                                                         |   |              |   |                  |   |                 |   |             |   |                    |   |                 |   |                             |   |                  |   |                        |    |       |
| 142 | output7<br>Show the field ONLY if:<br>[outputs_yn]='1' and [exclude] = '0' and [output6] <> "          | Output 7:                                                        | notes                                                                                                                                                                                                                                                                                                                                                                                                                                                                                                   |   |              |   |                  |   |                 |   |             |   |                    |   |                 |   |                             |   |                  |   |                        |    |       |
| 143 | op_def_output7<br>Show the field ONLY if:<br>[outputs_yn]='1' and [exclude] = '0' and [output7] <> "   | What is the operational definition/ How is this output measured? | notes                                                                                                                                                                                                                                                                                                                                                                                                                                                                                                   |   |              |   |                  |   |                 |   |             |   |                    |   |                 |   |                             |   |                  |   |                        |    |       |
| 144 | output_address_7<br>Show the field ONLY if:<br>[exclude] = '0' and [output7] <> "                      | What service/program component does this output address?         | dropdown<br><table border="1"> <tr><td>1</td><td>Satisfaction</td></tr> <tr><td>2</td><td>Economic outputs</td></tr> <tr><td>3</td><td>Law enforcement</td></tr> <tr><td>4</td><td>Prosecution</td></tr> <tr><td>5</td><td>Forensic interview</td></tr> <tr><td>6</td><td>CPS/Social Work</td></tr> <tr><td></td><td></td></tr> </table>                                                                                                                                                                | 1 | Satisfaction | 2 | Economic outputs | 3 | Law enforcement | 4 | Prosecution | 5 | Forensic interview | 6 | CPS/Social Work |   |                             |   |                  |   |                        |    |       |
| 1   | Satisfaction                                                                                           |                                                                  |                                                                                                                                                                                                                                                                                                                                                                                                                                                                                                         |   |              |   |                  |   |                 |   |             |   |                    |   |                 |   |                             |   |                  |   |                        |    |       |
| 2   | Economic outputs                                                                                       |                                                                  |                                                                                                                                                                                                                                                                                                                                                                                                                                                                                                         |   |              |   |                  |   |                 |   |             |   |                    |   |                 |   |                             |   |                  |   |                        |    |       |
| 3   | Law enforcement                                                                                        |                                                                  |                                                                                                                                                                                                                                                                                                                                                                                                                                                                                                         |   |              |   |                  |   |                 |   |             |   |                    |   |                 |   |                             |   |                  |   |                        |    |       |
| 4   | Prosecution                                                                                            |                                                                  |                                                                                                                                                                                                                                                                                                                                                                                                                                                                                                         |   |              |   |                  |   |                 |   |             |   |                    |   |                 |   |                             |   |                  |   |                        |    |       |
| 5   | Forensic interview                                                                                     |                                                                  |                                                                                                                                                                                                                                                                                                                                                                                                                                                                                                         |   |              |   |                  |   |                 |   |             |   |                    |   |                 |   |                             |   |                  |   |                        |    |       |
| 6   | CPS/Social Work                                                                                        |                                                                  |                                                                                                                                                                                                                                                                                                                                                                                                                                                                                                         |   |              |   |                  |   |                 |   |             |   |                    |   |                 |   |                             |   |                  |   |                        |    |       |
|     |                                                                                                        |                                                                  |                                                                                                                                                                                                                                                                                                                                                                                                                                                                                                         |   |              |   |                  |   |                 |   |             |   |                    |   |                 |   |                             |   |                  |   |                        |    |       |

|    |                             |
|----|-----------------------------|
| 7  | Victim and Family Advocates |
| 8  | Medical services            |
| 9  | Mental health services      |
| 10 | Other                       |

|     |                                                                                                  |        |      |
|-----|--------------------------------------------------------------------------------------------------|--------|------|
| 145 | output_address_other_7<br>Show the field ONLY if:<br>[exclude] = '0' and [output_address_7]='10' | Other: | text |
|-----|--------------------------------------------------------------------------------------------------|--------|------|

|     |                                                                                                        |                    |                                                                                                                                                      |   |           |   |         |   |           |
|-----|--------------------------------------------------------------------------------------------------------|--------------------|------------------------------------------------------------------------------------------------------------------------------------------------------|---|-----------|---|---------|---|-----------|
| 146 | satis_type_7<br>Show the field ONLY if:<br>[output_address] = '1' and [exclude]='0' and [output7] <> " | Satisfaction type: | radio<br><table border="1"> <tr><td>1</td><td>Caregiver</td></tr> <tr><td>2</td><td>Patient</td></tr> <tr><td>3</td><td>MDT staff</td></tr> </table> | 1 | Caregiver | 2 | Patient | 3 | MDT staff |
| 1   | Caregiver                                                                                              |                    |                                                                                                                                                      |   |           |   |         |   |           |
| 2   | Patient                                                                                                |                    |                                                                                                                                                      |   |           |   |         |   |           |
| 3   | MDT staff                                                                                              |                    |                                                                                                                                                      |   |           |   |         |   |           |

|     |                                                                                               |           |       |
|-----|-----------------------------------------------------------------------------------------------|-----------|-------|
| 147 | output8<br>Show the field ONLY if:<br>[outputs_yn]='1' and [exclude] = '0' and [output7] <> " | Output 8: | notes |
|-----|-----------------------------------------------------------------------------------------------|-----------|-------|

|     |                                                                                                      |                                                                  |       |
|-----|------------------------------------------------------------------------------------------------------|------------------------------------------------------------------|-------|
| 148 | op_def_output8<br>Show the field ONLY if:<br>[outputs_yn]='1' and [exclude] = '0' and [output8] <> " | What is the operational definition/ How is this output measured? | notes |
|-----|------------------------------------------------------------------------------------------------------|------------------------------------------------------------------|-------|

|     |                                                                                   |                                                          |                                                                                                                                                                                                                                                                                                                                                                                                                                                                                                         |   |              |   |                  |   |                 |   |             |   |                    |   |                 |   |                             |   |                  |   |                        |    |       |
|-----|-----------------------------------------------------------------------------------|----------------------------------------------------------|---------------------------------------------------------------------------------------------------------------------------------------------------------------------------------------------------------------------------------------------------------------------------------------------------------------------------------------------------------------------------------------------------------------------------------------------------------------------------------------------------------|---|--------------|---|------------------|---|-----------------|---|-------------|---|--------------------|---|-----------------|---|-----------------------------|---|------------------|---|------------------------|----|-------|
| 149 | output_address_8<br>Show the field ONLY if:<br>[exclude] = '0' and [output8] <> " | What service/program component does this output address? | dropdown<br><table border="1"> <tr><td>1</td><td>Satisfaction</td></tr> <tr><td>2</td><td>Economic outputs</td></tr> <tr><td>3</td><td>Law enforcement</td></tr> <tr><td>4</td><td>Prosecution</td></tr> <tr><td>5</td><td>Forensic interview</td></tr> <tr><td>6</td><td>CPS/Social Work</td></tr> <tr><td>7</td><td>Victim and Family Advocates</td></tr> <tr><td>8</td><td>Medical services</td></tr> <tr><td>9</td><td>Mental health services</td></tr> <tr><td>10</td><td>Other</td></tr> </table> | 1 | Satisfaction | 2 | Economic outputs | 3 | Law enforcement | 4 | Prosecution | 5 | Forensic interview | 6 | CPS/Social Work | 7 | Victim and Family Advocates | 8 | Medical services | 9 | Mental health services | 10 | Other |
| 1   | Satisfaction                                                                      |                                                          |                                                                                                                                                                                                                                                                                                                                                                                                                                                                                                         |   |              |   |                  |   |                 |   |             |   |                    |   |                 |   |                             |   |                  |   |                        |    |       |
| 2   | Economic outputs                                                                  |                                                          |                                                                                                                                                                                                                                                                                                                                                                                                                                                                                                         |   |              |   |                  |   |                 |   |             |   |                    |   |                 |   |                             |   |                  |   |                        |    |       |
| 3   | Law enforcement                                                                   |                                                          |                                                                                                                                                                                                                                                                                                                                                                                                                                                                                                         |   |              |   |                  |   |                 |   |             |   |                    |   |                 |   |                             |   |                  |   |                        |    |       |
| 4   | Prosecution                                                                       |                                                          |                                                                                                                                                                                                                                                                                                                                                                                                                                                                                                         |   |              |   |                  |   |                 |   |             |   |                    |   |                 |   |                             |   |                  |   |                        |    |       |
| 5   | Forensic interview                                                                |                                                          |                                                                                                                                                                                                                                                                                                                                                                                                                                                                                                         |   |              |   |                  |   |                 |   |             |   |                    |   |                 |   |                             |   |                  |   |                        |    |       |
| 6   | CPS/Social Work                                                                   |                                                          |                                                                                                                                                                                                                                                                                                                                                                                                                                                                                                         |   |              |   |                  |   |                 |   |             |   |                    |   |                 |   |                             |   |                  |   |                        |    |       |
| 7   | Victim and Family Advocates                                                       |                                                          |                                                                                                                                                                                                                                                                                                                                                                                                                                                                                                         |   |              |   |                  |   |                 |   |             |   |                    |   |                 |   |                             |   |                  |   |                        |    |       |
| 8   | Medical services                                                                  |                                                          |                                                                                                                                                                                                                                                                                                                                                                                                                                                                                                         |   |              |   |                  |   |                 |   |             |   |                    |   |                 |   |                             |   |                  |   |                        |    |       |
| 9   | Mental health services                                                            |                                                          |                                                                                                                                                                                                                                                                                                                                                                                                                                                                                                         |   |              |   |                  |   |                 |   |             |   |                    |   |                 |   |                             |   |                  |   |                        |    |       |
| 10  | Other                                                                             |                                                          |                                                                                                                                                                                                                                                                                                                                                                                                                                                                                                         |   |              |   |                  |   |                 |   |             |   |                    |   |                 |   |                             |   |                  |   |                        |    |       |

|     |                                                                                                  |        |      |
|-----|--------------------------------------------------------------------------------------------------|--------|------|
| 150 | output_address_other_8<br>Show the field ONLY if:<br>[exclude] = '0' and [output_address_8]='10' | Other: | text |
|-----|--------------------------------------------------------------------------------------------------|--------|------|

|     |                                                                                                        |                    |                                                                                                                                                      |   |           |   |         |   |           |
|-----|--------------------------------------------------------------------------------------------------------|--------------------|------------------------------------------------------------------------------------------------------------------------------------------------------|---|-----------|---|---------|---|-----------|
| 151 | satis_type_8<br>Show the field ONLY if:<br>[output_address] = '1' and [exclude]='0' and [output8] <> " | Satisfaction type: | radio<br><table border="1"> <tr><td>1</td><td>Caregiver</td></tr> <tr><td>2</td><td>Patient</td></tr> <tr><td>3</td><td>MDT staff</td></tr> </table> | 1 | Caregiver | 2 | Patient | 3 | MDT staff |
| 1   | Caregiver                                                                                              |                    |                                                                                                                                                      |   |           |   |         |   |           |
| 2   | Patient                                                                                                |                    |                                                                                                                                                      |   |           |   |         |   |           |
| 3   | MDT staff                                                                                              |                    |                                                                                                                                                      |   |           |   |         |   |           |

|     |                                                                                               |           |       |
|-----|-----------------------------------------------------------------------------------------------|-----------|-------|
| 152 | output9<br>Show the field ONLY if:<br>[outputs_yn]='1' and [exclude] = '0' and [output8] <> " | Output 9: | notes |
|-----|-----------------------------------------------------------------------------------------------|-----------|-------|

|     |                                                                                                      |                                                                  |       |
|-----|------------------------------------------------------------------------------------------------------|------------------------------------------------------------------|-------|
| 153 | op_def_output9<br>Show the field ONLY if:<br>[outputs_yn]='1' and [exclude] = '0' and [output9] <> " | What is the operational definition/ How is this output measured? | notes |
|-----|------------------------------------------------------------------------------------------------------|------------------------------------------------------------------|-------|

|     |                                                                                   |                                                          |                                                                                                                                                           |   |              |   |                  |  |  |
|-----|-----------------------------------------------------------------------------------|----------------------------------------------------------|-----------------------------------------------------------------------------------------------------------------------------------------------------------|---|--------------|---|------------------|--|--|
| 154 | output_address_9<br>Show the field ONLY if:<br>[exclude] = '0' and [output9] <> " | What service/program component does this output address? | dropdown<br><table border="1"> <tr><td>1</td><td>Satisfaction</td></tr> <tr><td>2</td><td>Economic outputs</td></tr> <tr><td></td><td></td></tr> </table> | 1 | Satisfaction | 2 | Economic outputs |  |  |
| 1   | Satisfaction                                                                      |                                                          |                                                                                                                                                           |   |              |   |                  |  |  |
| 2   | Economic outputs                                                                  |                                                          |                                                                                                                                                           |   |              |   |                  |  |  |
|     |                                                                                   |                                                          |                                                                                                                                                           |   |              |   |                  |  |  |



|     |                                                                                                          |                                                                  |  |                                                                                                                                                                                                                                                                                                                                                                                                                                                                                                      |   |                 |   |                  |   |                    |   |                 |   |                             |   |                  |   |                             |    |                  |   |                        |    |       |
|-----|----------------------------------------------------------------------------------------------------------|------------------------------------------------------------------|--|------------------------------------------------------------------------------------------------------------------------------------------------------------------------------------------------------------------------------------------------------------------------------------------------------------------------------------------------------------------------------------------------------------------------------------------------------------------------------------------------------|---|-----------------|---|------------------|---|--------------------|---|-----------------|---|-----------------------------|---|------------------|---|-----------------------------|----|------------------|---|------------------------|----|-------|
|     |                                                                                                          |                                                                  |  | <table border="1"> <tr><td>3</td><td>Law enforcement</td></tr> <tr><td>4</td><td>Prosecution</td></tr> <tr><td>5</td><td>Forensic interview</td></tr> <tr><td>6</td><td>CPS/Social Work</td></tr> <tr><td>7</td><td>Victim and Family Advocates</td></tr> <tr><td>8</td><td>Medical services</td></tr> <tr><td>9</td><td>Mental health services</td></tr> <tr><td>10</td><td>Other</td></tr> </table>                                                                                                | 3 | Law enforcement | 4 | Prosecution      | 5 | Forensic interview | 6 | CPS/Social Work | 7 | Victim and Family Advocates | 8 | Medical services | 9 | Mental health services      | 10 | Other            |   |                        |    |       |
| 3   | Law enforcement                                                                                          |                                                                  |  |                                                                                                                                                                                                                                                                                                                                                                                                                                                                                                      |   |                 |   |                  |   |                    |   |                 |   |                             |   |                  |   |                             |    |                  |   |                        |    |       |
| 4   | Prosecution                                                                                              |                                                                  |  |                                                                                                                                                                                                                                                                                                                                                                                                                                                                                                      |   |                 |   |                  |   |                    |   |                 |   |                             |   |                  |   |                             |    |                  |   |                        |    |       |
| 5   | Forensic interview                                                                                       |                                                                  |  |                                                                                                                                                                                                                                                                                                                                                                                                                                                                                                      |   |                 |   |                  |   |                    |   |                 |   |                             |   |                  |   |                             |    |                  |   |                        |    |       |
| 6   | CPS/Social Work                                                                                          |                                                                  |  |                                                                                                                                                                                                                                                                                                                                                                                                                                                                                                      |   |                 |   |                  |   |                    |   |                 |   |                             |   |                  |   |                             |    |                  |   |                        |    |       |
| 7   | Victim and Family Advocates                                                                              |                                                                  |  |                                                                                                                                                                                                                                                                                                                                                                                                                                                                                                      |   |                 |   |                  |   |                    |   |                 |   |                             |   |                  |   |                             |    |                  |   |                        |    |       |
| 8   | Medical services                                                                                         |                                                                  |  |                                                                                                                                                                                                                                                                                                                                                                                                                                                                                                      |   |                 |   |                  |   |                    |   |                 |   |                             |   |                  |   |                             |    |                  |   |                        |    |       |
| 9   | Mental health services                                                                                   |                                                                  |  |                                                                                                                                                                                                                                                                                                                                                                                                                                                                                                      |   |                 |   |                  |   |                    |   |                 |   |                             |   |                  |   |                             |    |                  |   |                        |    |       |
| 10  | Other                                                                                                    |                                                                  |  |                                                                                                                                                                                                                                                                                                                                                                                                                                                                                                      |   |                 |   |                  |   |                    |   |                 |   |                             |   |                  |   |                             |    |                  |   |                        |    |       |
| 155 | output_address_other_9<br>Show the field ONLY if:<br>[exclude] = '0' and [output_address_9]='10'         | Other:                                                           |  | text                                                                                                                                                                                                                                                                                                                                                                                                                                                                                                 |   |                 |   |                  |   |                    |   |                 |   |                             |   |                  |   |                             |    |                  |   |                        |    |       |
| 156 | satis_type_9<br>Show the field ONLY if:<br>[output_address] = '1' and [exclude]='0' and [output9] <> "   | Satisfaction type:                                               |  | radio <table border="1"> <tr><td>1</td><td>Caregiver</td></tr> <tr><td>2</td><td>Patient</td></tr> <tr><td>3</td><td>MDT staff</td></tr> </table>                                                                                                                                                                                                                                                                                                                                                    | 1 | Caregiver       | 2 | Patient          | 3 | MDT staff          |   |                 |   |                             |   |                  |   |                             |    |                  |   |                        |    |       |
| 1   | Caregiver                                                                                                |                                                                  |  |                                                                                                                                                                                                                                                                                                                                                                                                                                                                                                      |   |                 |   |                  |   |                    |   |                 |   |                             |   |                  |   |                             |    |                  |   |                        |    |       |
| 2   | Patient                                                                                                  |                                                                  |  |                                                                                                                                                                                                                                                                                                                                                                                                                                                                                                      |   |                 |   |                  |   |                    |   |                 |   |                             |   |                  |   |                             |    |                  |   |                        |    |       |
| 3   | MDT staff                                                                                                |                                                                  |  |                                                                                                                                                                                                                                                                                                                                                                                                                                                                                                      |   |                 |   |                  |   |                    |   |                 |   |                             |   |                  |   |                             |    |                  |   |                        |    |       |
| 157 | output10<br>Show the field ONLY if:<br>[outputs_yn]='1' and [exclude] = '0' and [output9] <> "           | Outcome 10:                                                      |  | notes                                                                                                                                                                                                                                                                                                                                                                                                                                                                                                |   |                 |   |                  |   |                    |   |                 |   |                             |   |                  |   |                             |    |                  |   |                        |    |       |
| 158 | op_def_output10<br>Show the field ONLY if:<br>[outputs_yn]='1' and [exclude] = '0' and [output10] <> "   | What is the operational definition/ How is this output measured? |  | notes                                                                                                                                                                                                                                                                                                                                                                                                                                                                                                |   |                 |   |                  |   |                    |   |                 |   |                             |   |                  |   |                             |    |                  |   |                        |    |       |
| 159 | output_address_10<br>Show the field ONLY if:<br>[exclude] = '0' and [output10] <> "                      | What service/program component does this output address?         |  | dropdown <table border="1"> <tr><td>1</td><td>Satisfaction</td></tr> <tr><td>2</td><td>Economic outputs</td></tr> <tr><td>3</td><td>Law enforcement</td></tr> <tr><td>4</td><td>Prosecution</td></tr> <tr><td>5</td><td>Forensic interview</td></tr> <tr><td>6</td><td>CPS/Social Work</td></tr> <tr><td>7</td><td>Victim and Family Advocates</td></tr> <tr><td>8</td><td>Medical services</td></tr> <tr><td>9</td><td>Mental health services</td></tr> <tr><td>10</td><td>Other</td></tr> </table> | 1 | Satisfaction    | 2 | Economic outputs | 3 | Law enforcement    | 4 | Prosecution     | 5 | Forensic interview          | 6 | CPS/Social Work  | 7 | Victim and Family Advocates | 8  | Medical services | 9 | Mental health services | 10 | Other |
| 1   | Satisfaction                                                                                             |                                                                  |  |                                                                                                                                                                                                                                                                                                                                                                                                                                                                                                      |   |                 |   |                  |   |                    |   |                 |   |                             |   |                  |   |                             |    |                  |   |                        |    |       |
| 2   | Economic outputs                                                                                         |                                                                  |  |                                                                                                                                                                                                                                                                                                                                                                                                                                                                                                      |   |                 |   |                  |   |                    |   |                 |   |                             |   |                  |   |                             |    |                  |   |                        |    |       |
| 3   | Law enforcement                                                                                          |                                                                  |  |                                                                                                                                                                                                                                                                                                                                                                                                                                                                                                      |   |                 |   |                  |   |                    |   |                 |   |                             |   |                  |   |                             |    |                  |   |                        |    |       |
| 4   | Prosecution                                                                                              |                                                                  |  |                                                                                                                                                                                                                                                                                                                                                                                                                                                                                                      |   |                 |   |                  |   |                    |   |                 |   |                             |   |                  |   |                             |    |                  |   |                        |    |       |
| 5   | Forensic interview                                                                                       |                                                                  |  |                                                                                                                                                                                                                                                                                                                                                                                                                                                                                                      |   |                 |   |                  |   |                    |   |                 |   |                             |   |                  |   |                             |    |                  |   |                        |    |       |
| 6   | CPS/Social Work                                                                                          |                                                                  |  |                                                                                                                                                                                                                                                                                                                                                                                                                                                                                                      |   |                 |   |                  |   |                    |   |                 |   |                             |   |                  |   |                             |    |                  |   |                        |    |       |
| 7   | Victim and Family Advocates                                                                              |                                                                  |  |                                                                                                                                                                                                                                                                                                                                                                                                                                                                                                      |   |                 |   |                  |   |                    |   |                 |   |                             |   |                  |   |                             |    |                  |   |                        |    |       |
| 8   | Medical services                                                                                         |                                                                  |  |                                                                                                                                                                                                                                                                                                                                                                                                                                                                                                      |   |                 |   |                  |   |                    |   |                 |   |                             |   |                  |   |                             |    |                  |   |                        |    |       |
| 9   | Mental health services                                                                                   |                                                                  |  |                                                                                                                                                                                                                                                                                                                                                                                                                                                                                                      |   |                 |   |                  |   |                    |   |                 |   |                             |   |                  |   |                             |    |                  |   |                        |    |       |
| 10  | Other                                                                                                    |                                                                  |  |                                                                                                                                                                                                                                                                                                                                                                                                                                                                                                      |   |                 |   |                  |   |                    |   |                 |   |                             |   |                  |   |                             |    |                  |   |                        |    |       |
| 160 | output_address_other_10<br>Show the field ONLY if:<br>[exclude] = '0' and [output_address_10]='10'       | Other:                                                           |  | text                                                                                                                                                                                                                                                                                                                                                                                                                                                                                                 |   |                 |   |                  |   |                    |   |                 |   |                             |   |                  |   |                             |    |                  |   |                        |    |       |
| 161 | satis_type_10<br>Show the field ONLY if:<br>[output_address] = '1' and [exclude]='0' and [output10] <> " | Satisfaction type:                                               |  | radio <table border="1"> <tr><td>1</td><td>Caregiver</td></tr> <tr><td>2</td><td>Patient</td></tr> <tr><td>3</td><td>MDT staff</td></tr> </table>                                                                                                                                                                                                                                                                                                                                                    | 1 | Caregiver       | 2 | Patient          | 3 | MDT staff          |   |                 |   |                             |   |                  |   |                             |    |                  |   |                        |    |       |
| 1   | Caregiver                                                                                                |                                                                  |  |                                                                                                                                                                                                                                                                                                                                                                                                                                                                                                      |   |                 |   |                  |   |                    |   |                 |   |                             |   |                  |   |                             |    |                  |   |                        |    |       |
| 2   | Patient                                                                                                  |                                                                  |  |                                                                                                                                                                                                                                                                                                                                                                                                                                                                                                      |   |                 |   |                  |   |                    |   |                 |   |                             |   |                  |   |                             |    |                  |   |                        |    |       |
| 3   | MDT staff                                                                                                |                                                                  |  |                                                                                                                                                                                                                                                                                                                                                                                                                                                                                                      |   |                 |   |                  |   |                    |   |                 |   |                             |   |                  |   |                             |    |                  |   |                        |    |       |
| 162 | tot_outputs<br>Show the field ONLY if:<br>[exclude] = '0'                                                | How many total outputs were addressed in this paper?             |  | dropdown <table border="1"> <tr><td>1</td><td>1</td></tr> <tr><td>2</td><td>2</td></tr> <tr><td>3</td><td>3</td></tr> <tr><td>4</td><td>4</td></tr> <tr><td>5</td><td>5</td></tr> <tr><td></td><td></td></tr> </table>                                                                                                                                                                                                                                                                               | 1 | 1               | 2 | 2                | 3 | 3                  | 4 | 4               | 5 | 5                           |   |                  |   |                             |    |                  |   |                        |    |       |
| 1   | 1                                                                                                        |                                                                  |  |                                                                                                                                                                                                                                                                                                                                                                                                                                                                                                      |   |                 |   |                  |   |                    |   |                 |   |                             |   |                  |   |                             |    |                  |   |                        |    |       |
| 2   | 2                                                                                                        |                                                                  |  |                                                                                                                                                                                                                                                                                                                                                                                                                                                                                                      |   |                 |   |                  |   |                    |   |                 |   |                             |   |                  |   |                             |    |                  |   |                        |    |       |
| 3   | 3                                                                                                        |                                                                  |  |                                                                                                                                                                                                                                                                                                                                                                                                                                                                                                      |   |                 |   |                  |   |                    |   |                 |   |                             |   |                  |   |                             |    |                  |   |                        |    |       |
| 4   | 4                                                                                                        |                                                                  |  |                                                                                                                                                                                                                                                                                                                                                                                                                                                                                                      |   |                 |   |                  |   |                    |   |                 |   |                             |   |                  |   |                             |    |                  |   |                        |    |       |
| 5   | 5                                                                                                        |                                                                  |  |                                                                                                                                                                                                                                                                                                                                                                                                                                                                                                      |   |                 |   |                  |   |                    |   |                 |   |                             |   |                  |   |                             |    |                  |   |                        |    |       |
|     |                                                                                                          |                                                                  |  |                                                                                                                                                                                                                                                                                                                                                                                                                                                                                                      |   |                 |   |                  |   |                    |   |                 |   |                             |   |                  |   |                             |    |                  |   |                        |    |       |

|     |                                                                                         |                                                                                                          |                                                                                                                                                                                                                                                                                                                                                                                 |                                   |
|-----|-----------------------------------------------------------------------------------------|----------------------------------------------------------------------------------------------------------|---------------------------------------------------------------------------------------------------------------------------------------------------------------------------------------------------------------------------------------------------------------------------------------------------------------------------------------------------------------------------------|-----------------------------------|
|     |                                                                                         |                                                                                                          |                                                                                                                                                                                                                                                                                                                                                                                 | 6 6<br>7 7<br>8 8<br>9 9<br>10 10 |
| 163 | findings<br>Show the field ONLY if:<br>[exclude] = '0'                                  | Section Header: <i>FINDINGS</i><br>Findings:                                                             | notes<br>Custom alignment: LV                                                                                                                                                                                                                                                                                                                                                   |                                   |
| 164 | cac_principle<br>Show the field ONLY if:<br>[exclude] = '0'                             | Which of the 10 CAC core principles best matches up with the themes presented in this paper (SELECT ONE) | dropdown<br>1 1, MDT<br>2 2, Cultural competency and diversity<br>3 3, Forensic interviews<br>4 4, Victim support & advocacy<br>5 5, Medical evaluation<br>6 6, Mental health<br>7 7, Case review<br>8 8, Case tracking<br>9 9, Organizational capacity (administrative policy & procedures)<br>10 10, Child-focused setting<br>11 Multiple (please provide more details below) |                                   |
| 165 | multiple_details<br>Show the field ONLY if:<br>[cac_principle] = '11'                   | Multiple principles addressed:                                                                           | notes                                                                                                                                                                                                                                                                                                                                                                           |                                   |
| 166 | limitations<br>Show the field ONLY if:<br>[exclude] = '0'                               | Section Header: <i>LIMITATIONS</i><br>Limitations:                                                       | notes<br>Custom alignment: LV                                                                                                                                                                                                                                                                                                                                                   |                                   |
| 167 | recommendation1<br>Show the field ONLY if:<br>[exclude] = '0'                           | Section Header: <i>FUTURE RECOMMENDATIONS</i><br>Recommendation 1:                                       | notes                                                                                                                                                                                                                                                                                                                                                                           |                                   |
| 168 | recommendation2<br>Show the field ONLY if:<br>[exclude] = '0' and [recommendation1] <>" | Recommendation 2:                                                                                        | notes                                                                                                                                                                                                                                                                                                                                                                           |                                   |
| 169 | recommendation3<br>Show the field ONLY if:<br>[exclude] = '0' and [recommendation2] <>" | Recommendation 3:                                                                                        | notes                                                                                                                                                                                                                                                                                                                                                                           |                                   |
| 170 | recommendation4<br>Show the field ONLY if:<br>[exclude] = '0' and [recommendation3] <>" | Recommendation 4:                                                                                        | notes                                                                                                                                                                                                                                                                                                                                                                           |                                   |
| 171 | recommendation5<br>Show the field ONLY if:<br>[exclude] = '0' and [recommendation4] <>" | Recommendation 5:                                                                                        | notes                                                                                                                                                                                                                                                                                                                                                                           |                                   |
| 172 | grant_funded<br>Show the field ONLY if:<br>[exclude] = '0'                              | Section Header: <i>FUNDING</i><br>Grant funded/received financial compensation?                          | yesno<br>1 Yes<br>0 No                                                                                                                                                                                                                                                                                                                                                          |                                   |
| 173 | funder                                                                                  | Funder:                                                                                                  | text                                                                                                                                                                                                                                                                                                                                                                            |                                   |

|   |            |                                            |                                                 |                                                                                                                                                        |   |            |   |            |   |          |
|---|------------|--------------------------------------------|-------------------------------------------------|--------------------------------------------------------------------------------------------------------------------------------------------------------|---|------------|---|------------|---|----------|
|   |            | Show the field ONLY if:<br>[exclude] = '0' |                                                 |                                                                                                                                                        |   |            |   |            |   |          |
|   | 174        | scoping_review_cacs_complet<br>e           | Section Header: <i>Form Status</i><br>Complete? | dropdown<br><table border="1"><tr><td>0</td><td>Incomplete</td></tr><tr><td>1</td><td>Unverified</td></tr><tr><td>2</td><td>Complete</td></tr></table> | 0 | Incomplete | 1 | Unverified | 2 | Complete |
| 0 | Incomplete |                                            |                                                 |                                                                                                                                                        |   |            |   |            |   |          |
| 1 | Unverified |                                            |                                                 |                                                                                                                                                        |   |            |   |            |   |          |
| 2 | Complete   |                                            |                                                 |                                                                                                                                                        |   |            |   |            |   |          |
